# Supplementary material for: Receptor deorphanization in an echinoderm reveals kisspeptin evolution and relationship with SALMFamide neuropeptides
Source: BMC Biol. 2022 Aug 24;20:187. doi: 10.1186/s12915-022-01387-z (PMC9400282; doi:10.1186/s12915-022-01387-z)
Supplement: Supplementary file 11 — Additional file 11. Data analysed to determine the number of genes, if any, located between genes encoding kisspeptin-type receptors in the A. rubens genome. The results of this analysis are shown in Fig. 2C. [file 12915_2022_1387_MOESM11_ESM.xlsx]

## Sheet: Chromosome 10 A
Gene ID	Symbol	Gene name	Scientific name	Chromosome	Chromosome ID	Start	End	Transcripts IDs	Proteins IDs
117295508	LOC117295508	neuronal acetylcholine receptor subunit alpha-9-like	Asterias rubens	10	NC_047071.1	18496673	18526089	XM_033778195.1	XP_033634086.1
117295875	LOC117295875	somatostatin receptor type 2-like	Asterias rubens	10	NC_047071.1	18562066	18564474	XM_033778659.1	XP_033634550.1
117296123	LOC117296123	G-protein coupled receptor 54-like KPR7	Asterias rubens	10	NC_047071.1	18681764	18696290	XM_033778997.1	XP_033634888.1
117295759	LOC117295759	G-protein coupled receptor 54-like KPR6	Asterias rubens	10	NC_047071.1	18749280	18815718	XM_033778495.1,XM_033778496.1	XP_033634386.1,XP_033634387.1
117295721	LOC117295721	kiSS-1 receptor-like KPR5	Asterias rubens	10	NC_047071.1	18826595	18837041	XM_033778438.1	XP_033634329.1
117295611	LOC117295611	alpha-aminoadipic semialdehyde dehydrogenase-like	Asterias rubens	10	NC_047071.1	19006294	19069347	XM_033778316.1	XP_033634207.1
117295940	LOC117295940	transmembrane protein 234-like	Asterias rubens	10	NC_047071.1	19069797	19072541	XM_033778745.1	XP_033634636.1

## Sheet: Chromosome 10 B
Gene ID	Symbol	Gene name	Scientific name	Chromosome	Chromosome ID	Start	End	Transcripts IDs	Proteins IDs
117295936	LOC117295936	aquaporin-9-like	Asterias rubens	10	NC_047071.1	13007779	13017582	XM_033778739.1	XP_033634630.1
117295844	LOC117295844	aquaporin-10-like	Asterias rubens	10	NC_047071.1	13018843	13033810	XM_033778618.1,XM_033778619.1	XP_033634509.1,XP_033634510.1
117295898	LOC117295898	G-protein coupled receptor 54-like KPR8	Asterias rubens	10	NC_047071.1	13045878	13062445	XM_033778687.1	XP_033634578.1
117295990	LOC117295990	G-protein coupled receptor 54-like KPR9	Asterias rubens	10	NC_047071.1	13218759	13221582	XM_033778818.1	XP_033634709.1
117295815	LOC117295815	protein dead ringer homolog	Asterias rubens	10	NC_047071.1	13232111	13273602	XM_033778577.1	XP_033634468.1
117295765	LOC117295765	cholinesterase 2-like	Asterias rubens	10	NC_047071.1	13275617	13283553	XM_033778505.1	XP_033634396.1

## Sheet: Chromosome 15
Gene ID	Symbol	Gene name	Scientific name	Chromosome	Chromosome ID	Start	End	Transcripts IDs	Proteins IDs
117300163	LOC117300163	G-protein coupled receptor 54-like KPR2	Asterias rubens	15	NC_047076.1	9355206	9360347	XM_033783882.1	XP_033639773.1
117299772	LOC117299772	band 4.1-like protein 5	Asterias rubens	15	NC_047076.1	9366249	9411110	XM_033783279.1,XM_033783280.1,XM_033783281.1,XM_033783282.1,XM_033783283.1,XM_033783284.1,XM_033783285.1,XM_033783286.1	XP_033639170.1,XP_033639171.1,XP_033639172.1,XP_033639173.1,XP_033639174.1,XP_033639175.1,XP_033639176.1,XP_033639177.1
117300005	LOC117300005	probable serine carboxypeptidase CPVL	Asterias rubens	15	NC_047076.1	9411269	9445410	XM_033783648.1	XP_033639539.1
117300244	LOC117300244	uncharacterized LOC117300244	Asterias rubens	15	NC_047076.1	9413844	9415936	XM_033783971.1	XP_033639862.1
117300245	LOC117300245	uncharacterized protein K02A2.6-like	Asterias rubens	15	NC_047076.1	9481973	9485002	XM_033783973.1	XP_033639864.1
117300356	LOC117300356	uncharacterized LOC117300356	Asterias rubens	15	NC_047076.1	9568565	9573083	XM_033784121.1	XP_033640012.1
117300248	LOC117300248	uncharacterized LOC117300248	Asterias rubens	15	NC_047076.1	9575366	9645770	XM_033783976.1	XP_033639867.1
117300121	LOC117300121	uncharacterized LOC117300121	Asterias rubens	15	NC_047076.1	9582865	9584312	XM_033783824.1	XP_033639715.1
117300362	LOC117300362	5'-AMP-activated protein kinase subunit gamma-2-like	Asterias rubens	15	NC_047076.1	9665263	9731957	XM_033784134.1,XM_033784135.1	XP_033640025.1,XP_033640026.1
117300250	LOC117300250	uncharacterized LOC117300250	Asterias rubens	15	NC_047076.1	9747184	9748764	XM_033783977.1	XP_033639868.1
117300146	LOC117300146	cullin-2-like	Asterias rubens	15	NC_047076.1	9766118	9871949	XM_033783865.1,XM_033783866.1	XP_033639756.1,XP_033639757.1
117300147	LOC117300147	uncharacterized LOC117300147	Asterias rubens	15	NC_047076.1	9809971	9812686	XM_033783867.1	XP_033639758.1
117300255	LOC117300255	uncharacterized protein K02A2.6-like	Asterias rubens	15	NC_047076.1	9867403	9870783	XM_033783985.1	XP_033639876.1
117299944	LOC117299944	polypeptide N-acetylgalactosaminyltransferase 11-like	Asterias rubens	15	NC_047076.1	9873325	9914122	XM_033783560.1	XP_033639451.1
117299938	LOC117299938	plexin domain-containing protein 2-like	Asterias rubens	15	NC_047076.1	9919300	9953544	XM_033783551.1	XP_033639442.1
117300355	LOC117300355	E3 ubiquitin-protein ligase TRIM33-like	Asterias rubens	15	NC_047076.1	9969729	9989745	XM_033784120.1,XR_004520166.1	XP_033640011.1
117299887	LOC117299887	uncharacterized LOC117299887	Asterias rubens	15	NC_047076.1	10032702	10066770	XM_033783475.1,XM_033783476.1	XP_033639366.1,XP_033639367.1
117300136	LOC117300136	small VCP/p97-interacting protein-like	Asterias rubens	15	NC_047076.1	10076135	10085911	XM_033783847.1	XP_033639738.1
117300318	LOC117300318	mitochondrial E3 ubiquitin protein ligase 1-like	Asterias rubens	15	NC_047076.1	10086365	10095784	XM_033784062.1	XP_033639953.1
117300256	LOC117300256	putative uncharacterized membrane protein YMR173W-A	Asterias rubens	15	NC_047076.1	10098789	10099625	XM_033783986.1	XP_033639877.1
117300039	LOC117300039	transformation/transcription domain-associated protein-like	Asterias rubens	15	NC_047076.1	10101521	10194216	XM_033783697.1	XP_033639588.1
117300377	LOC117300377	neo-calmodulin-like	Asterias rubens	15	NC_047076.1	10196571	10202284	XM_033784152.1	XP_033640043.1
117300321	LOC117300321	uncharacterized LOC117300321	Asterias rubens	15	NC_047076.1	10211308	10224884	XM_033784063.1,XM_033784064.1	XP_033639954.1,XP_033639955.1
117300179	LOC117300179	prostaglandin E synthase 3-like	Asterias rubens	15	NC_047076.1	10228620	10233362	XM_033783900.1	XP_033639791.1
117300119	LOC117300119	mediator of RNA polymerase II transcription subunit 24-like	Asterias rubens	15	NC_047076.1	10233745	10263836	XM_033783823.1	XP_033639714.1
117300055	LOC117300055	uncharacterized LOC117300055	Asterias rubens	15	NC_047076.1	10265558	10277682	XM_033783729.1	XP_033639620.1
117300138	LOC117300138	glutamic acid-rich protein-like	Asterias rubens	15	NC_047076.1	10277795	10285659	XM_033783850.1,XM_033783851.1,XM_033783852.1,XM_033783853.1	XP_033639741.1,XP_033639742.1,XP_033639743.1,XP_033639744.1
117299989	LOC117299989	Bardet-Biedl syndrome 5 protein homolog	Asterias rubens	15	NC_047076.1	10288437	10305409	XM_033783628.1,XM_033783629.1	XP_033639519.1,XP_033639520.1
117299904	LOC117299904	reticulophagy regulator 3-like	Asterias rubens	15	NC_047076.1	10308089	10314533	XM_033783495.1	XP_033639386.1
117299905	LOC117299905	60S ribosomal protein L37a	Asterias rubens	15	NC_047076.1	10316345	10321963	XM_033783496.1	XP_033639387.1
117299820	LOC117299820	zinc finger protein 622-like	Asterias rubens	15	NC_047076.1	10324495	10337347	XM_033783349.1	XP_033639240.1
117299819	LOC117299819	SWI/SNF-related matrix-associated actin-dependent regulator of chromatin subfamily A-like protein 1	Asterias rubens	15	NC_047076.1	10336683	10352696	XM_033783346.1,XM_033783348.1	XP_033639237.1,XP_033639239.1
117299821	LOC117299821	homologous-pairing protein 2 homolog	Asterias rubens	15	NC_047076.1	10352804	10374849	XM_033783350.1,XM_033783351.1	XP_033639241.1,XP_033639242.1
117299858	LOC117299858	reversion-inducing cysteine-rich protein with Kazal motifs-like	Asterias rubens	15	NC_047076.1	10379766	10445159	XM_033783427.1	XP_033639318.1
117300257	LOC117300257	uncharacterized LOC117300257	Asterias rubens	15	NC_047076.1	10445906	10453569	XM_033783988.1	XP_033639879.1
117300098	LOC117300098	acyl-CoA-binding protein-like	Asterias rubens	15	NC_047076.1	10454360	10459516	XM_033783791.1	XP_033639682.1
117300373	LOC117300373	sterol regulatory element-binding protein cleavage-activating protein-like	Asterias rubens	15	NC_047076.1	10466906	10499908	XM_033784150.1	XP_033640041.1
117300258	LOC117300258	integrin beta-1-like	Asterias rubens	15	NC_047076.1	10501970	10528047	XM_033783989.1	XP_033639880.1
117300134	LOC117300134	phosphatidylinositol transfer protein	Asterias rubens	15	NC_047076.1	10545157	10558867	XM_033783845.1	XP_033639736.1
117300259	LOC117300259	D(2) dopamine receptor-like	Asterias rubens	15	NC_047076.1	10565776	10567035	XM_033783990.1	XP_033639881.1
117299911	LOC117299911	integrin alpha-8-like	Asterias rubens	15	NC_047076.1	10608073	10625931	XM_033783503.1	XP_033639394.1
117300351	LOC117300351	2-amino-3-ketobutyrate coenzyme A ligase, mitochondrial-like	Asterias rubens	15	NC_047076.1	10652073	10659949	XM_033784115.1	XP_033640006.1
117300352	LOC117300352	ADP-ribosylation factor 1	Asterias rubens	15	NC_047076.1	10659982	10665154	XM_033784116.1	XP_033640007.1
117300260	LOC117300260	uncharacterized LOC117300260	Asterias rubens	15	NC_047076.1	10667718	10684027	XM_033783991.1	XP_033639882.1
117300401	LOC117300401	solute carrier family 40 member 1-like	Asterias rubens	15	NC_047076.1	10685817	10696233	XM_033784184.1,XM_033784185.1,XM_033784186.1	XP_033640075.1,XP_033640076.1,XP_033640077.1
117300149	LOC117300149	actin-related protein 2/3 complex subunit 2-like	Asterias rubens	15	NC_047076.1	10710754	10719153	XM_033783870.1	XP_033639761.1
117300270	LOC117300270	SH3 domain-binding protein 5-like	Asterias rubens	15	NC_047076.1	10719822	10727790	XM_033784004.1	XP_033639895.1
117300001	LOC117300001	double-stranded RNA-specific editase 1-like	Asterias rubens	15	NC_047076.1	10728225	10742728	XM_033783643.1,XM_033783644.1	XP_033639534.1,XP_033639535.1
117300309	LOC117300309	translational activator of cytochrome c oxidase 1-like	Asterias rubens	15	NC_047076.1	10761265	10772447	XM_033784050.1,XM_033784051.1,XM_033784052.1,XM_033784053.1	XP_033639941.1,XP_033639942.1,XP_033639943.1,XP_033639944.1
117300391	LOC117300391	uncharacterized LOC117300391	Asterias rubens	15	NC_047076.1	10775082	10777664	XM_033784173.1	XP_033640064.1
117300336	LOC117300336	uncharacterized LOC117300336	Asterias rubens	15	NC_047076.1	10779128	10794547	XM_033784088.1	XP_033639979.1
117300261	LOC117300261	uncharacterized LOC117300261	Asterias rubens	15	NC_047076.1	10809211	10813515	XM_033783992.1	XP_033639883.1
117300004	LOC117300004	vasoactive intestinal polypeptide receptor 1-like	Asterias rubens	15	NC_047076.1	10924713	10976058	XM_033783646.1,XM_033783647.1	XP_033639537.1,XP_033639538.1
117300263	LOC117300263	corticotropin-releasing factor receptor 2-like	Asterias rubens	15	NC_047076.1	11140048	11159994	XM_033783994.1	XP_033639885.1
117300264	LOC117300264	leucine-rich repeat flightless-interacting protein 2-like	Asterias rubens	15	NC_047076.1	11174625	11205441	XM_033783997.1	XP_033639888.1
117299872	LOC117299872	F-box/LRR-repeat protein 4-like	Asterias rubens	15	NC_047076.1	11222017	11283211	XM_033783454.1,XM_033783455.1	XP_033639345.1,XP_033639346.1
117299871	LOC117299871	tripartite motif-containing protein 2-like	Asterias rubens	15	NC_047076.1	11226639	11235811	XM_033783453.1	XP_033639344.1
117299873	LOC117299873	G-protein coupled receptor 54-like KPR1	Asterias rubens	15	NC_047076.1	11280139	11283813	XM_033783456.1	XP_033639347.1
117300132	LOC117300132	G-protein coupled receptor 54-like KPR3	Asterias rubens	15	NC_047076.1	11292239	11344990	XM_033783844.1	XP_033639735.1
117300177	LOC117300177	uncharacterized LOC117300177	Asterias rubens	15	NC_047076.1	11426206	11443779	XM_033783898.1	XP_033639789.1
117300172	LOC117300172	uncharacterized LOC117300172	Asterias rubens	15	NC_047076.1	11445658	11451257	XM_033783891.1	XP_033639782.1
117300265	LOC117300265	uncharacterized LOC117300265	Asterias rubens	15	NC_047076.1	11454186	11458068	XM_033783998.1	XP_033639889.1
117300036	LOC117300036	protein Hikeshi-like	Asterias rubens	15	NC_047076.1	11461386	11478078	XM_033783691.1,XM_033783692.1,XM_033783693.1,XM_033783694.1,XM_033783695.1,XR_004520134.1,XR_004520135.1,XR_004520136.1	XP_033639582.1,XP_033639583.1,XP_033639584.1,XP_033639585.1,XP_033639586.1
117300034	LOC117300034	uncharacterized LOC117300034	Asterias rubens	15	NC_047076.1	11462921	11463869	XM_033783690.1	XP_033639581.1
117300266	LOC117300266	glycoprotein-N-acetylgalactosamine 3-beta-galactosyltransferase 1-like	Asterias rubens	15	NC_047076.1	11508921	11510044	XM_033783999.1	XP_033639890.1
117300063	LOC117300063	ubiquitin carboxyl-terminal hydrolase MINDY-3-like	Asterias rubens	15	NC_047076.1	11513972	11531283	XM_033783736.1	XP_033639627.1
117300267	LOC117300267	mucin-2-like	Asterias rubens	15	NC_047076.1	11534485	11552660	XM_033784000.1	XP_033639891.1
117300268	LOC117300268	mucin-2-like	Asterias rubens	15	NC_047076.1	11552824	11596732	XM_033784001.1	XP_033639892.1
117300029	LOC117300029	triadin-like	Asterias rubens	15	NC_047076.1	11608107	11632577	XM_033783679.1	XP_033639570.1
117300030	LOC117300030	complement C1q and tumor necrosis factor-related protein 9B-like	Asterias rubens	15	NC_047076.1	11615359	11621473	XM_033783680.1	XP_033639571.1
117300182	LOC117300182	zinc finger MYND domain-containing protein 11-like	Asterias rubens	15	NC_047076.1	11634709	11655776	XM_033783903.1	XP_033639794.1
117299994	LOC117299994	cytidine monophosphate-N-acetylneuraminic acid hydroxylase	Asterias rubens	15	NC_047076.1	11664086	11694777	XM_033783633.1,XM_033783634.1,XM_033783635.1	XP_033639524.1,XP_033639525.1,XP_033639526.1
117300187	LOC117300187	PAN2-PAN3 deadenylation complex catalytic subunit PAN2-like	Asterias rubens	15	NC_047076.1	11695451	11701998	XM_033783911.1,XM_033783912.1	XP_033639802.1,XP_033639803.1
117300269	LOC117300269	PAN2-PAN3 deadenylation complex catalytic subunit PAN2-like	Asterias rubens	15	NC_047076.1	11702230	11726119	XM_033784002.1	XP_033639893.1
117300082	LOC117300082	vacuolar-sorting protein SNF8-like	Asterias rubens	15	NC_047076.1	11726295	11729873	XM_033783767.1	XP_033639658.1
117300419	LOC117300419	uncharacterized LOC117300419	Asterias rubens	15	NC_047076.1	11731232	11732925	XM_033784206.1	XP_033640097.1
117300271	LOC117300271	adenylate cyclase type 5-like	Asterias rubens	15	NC_047076.1	11737582	11866157	XM_033784005.1	XP_033639896.1
117300093	LOC117300093	carbonyl reductase [NADPH] 1-like	Asterias rubens	15	NC_047076.1	11869452	11875020	XM_033783783.1	XP_033639674.1
117300092	LOC117300092	carbonyl reductase [NADPH] 1-like	Asterias rubens	15	NC_047076.1	11876959	11883946	XM_033783782.1	XP_033639673.1
117300094	LOC117300094	uncharacterized LOC117300094	Asterias rubens	15	NC_047076.1	11887527	11890048	XM_033783784.1	XP_033639675.1
117300095	LOC117300095	neurocalcin homolog	Asterias rubens	15	NC_047076.1	11891060	11895681	XM_033783785.1,XM_033783786.1,XM_033783787.1,XM_033783788.1	XP_033639676.1,XP_033639677.1,XP_033639678.1,XP_033639679.1
117300272	LOC117300272	uncharacterized LOC117300272	Asterias rubens	15	NC_047076.1	11904000	11905103	XM_033784006.1	XP_033639897.1
117300097	LOC117300097	tetratricopeptide repeat protein 28-like	Asterias rubens	15	NC_047076.1	11905164	11913336	XM_033783789.1	XP_033639680.1
117300113	LOC117300113	uncharacterized LOC117300113	Asterias rubens	15	NC_047076.1	11933018	11937864	XM_033783810.1	XP_033639701.1
117299923	LOC117299923	methylmalonic aciduria and homocystinuria type D homolog, mitochondrial-like	Asterias rubens	15	NC_047076.1	11939583	11996395	XM_033783523.1,XM_033783526.1,XM_033783527.1	XP_033639414.1,XP_033639417.1,XP_033639418.1
117299921	LOC117299921	tripartite motif-containing protein 2-like	Asterias rubens	15	NC_047076.1	11953644	11956358	XM_033783521.1	XP_033639412.1
117299922	LOC117299922	G-protein coupled receptor 54-like KPR4	Asterias rubens	15	NC_047076.1	11980274	12017647	XM_033783522.1	XP_033639413.1
