# Supplementary material for: Receptor deorphanization in an echinoderm reveals kisspeptin evolution and relationship with SALMFamide neuropeptides
Source: BMC Biol. 2022 Aug 24;20:187. doi: 10.1186/s12915-022-01387-z (PMC9400282; doi:10.1186/s12915-022-01387-z)
Supplement: Supplementary file 15 — Additional file 15. Receptor assay source data for the graphs shown in Fig. 5 and in additional files 14, 19 and 20. [file 12915_2022_1387_MOESM15_ESM.xlsx]

## Sheet: ArKPR1
																						Bar plot data		ArKP1.1	ArKP1.2	ArKP2.2	ArL-SALMFa mix	ArF-SALMFa mix	Basal Media
	ArKP1.2 (Assay 1)				ArKP1.2 (Assay 2)						ArKP1.2 (Assay 3)						ArKP1.2 (Assay 4)					-5	Assay 1	70445	175994	76387	77125	83732	53705
	Raw data		Normalized		Raw data			Normalized			Raw data			Normalized			Raw data		Normalized					86667	126444	70912	73204	62429	48356
-14	54421	54195	-2.08197	-2.32806	61081	59612	51827	2.13215	-1.34799	-19.791	45206	35683	30772	18.4291	1.47992	-7.26077	134695	110472	25.649	1.17216				63189		57994	51603	51566
-13.3	60259	52301	4.27501	-4.39044	62977	63871	51383	6.62387	8.7418	-20.8429	42830	34606	31481	14.2003	-0.436945	-5.99888	127068	114601	17.9421	5.34442			Assay 2	47538	175284	45790	55440	57756	73981
-13	57611	50125	1.39161	-6.75988	67882	65782	53853	18.2441	13.2691	-14.9914	43305	36622	32471	15.0457	3.15117	-4.23686	130955	119085	21.8698	9.87541				48688	163862	52012	43720	46674	74152
-12.3	56149	54189	-0.200357	-2.3346	60963	60185	55654	1.8526	0.0094762	-10.7247	43012	34564	32620	14.5242	-0.511698	-3.97167	132471	108761	23.4017	-0.556774				58270		43756	59407	2654
-12	51780	48159	-4.95775	-8.90065	56839	55199	47574	-7.91737	-11.8026	-29.8666	34121	36528	34633	-1.30016	2.98387	-0.38889	132893	120005	23.8281	10.805
-11.3	54420	53154	-2.08306	-3.46161	58686	57409	48073	-3.54173	-6.56701	-28.6845	38280	34088	30730	6.10211	-1.35889	-7.33552	129631	109347	20.5319	0.0353668
-11	54163	56058	-2.36291	-0.299447	93982	55800	48709	80.0763	-10.3788	-27.1777	44649	31970	31152	17.4378	-5.12855	-6.58444	123533	104682	14.37	-4.67852
-10.3	48269	54370	-8.78087	-2.13751	58540	54805	49921	-3.88761	-12.736	-24.3065	39621	29177	32727	8.48884	-10.0996	-3.78122	130267	109750	21.1746	0.44259
-10	49285	53527	-7.67455	-3.05545	61955	59736	47071	4.2027	-1.05423	-31.0583	38608	34483	30679	6.68589	-0.655863	-7.42629	126482	101714	17.3499	-7.67762		In green highlight or blue numbers are data that are considered abnormal measurements
-9.3	48359	51934	-8.68287	-4.79006	63219	59184	49248	7.19718	-2.36194	-25.9008	41072	36673	31956	11.0714	3.24194	-5.15346	144166	124290	35.2192	15.1349
-9	55346	58549	-1.07474	2.413	62956	60211	54947	6.57412	0.0710715	-12.3996	44549	37327	35516	17.2598	4.40594	1.18269	139357	114292	30.3598	5.03218
-8.3	66855	76535	11.4574	21.9979	72250	82689	53055	28.5921	53.3226	-16.8819	59205	52157	47146	43.3448	30.8007	21.882	152571	134359	43.7123	25.3095
-8	82232	86566	28.2014	32.9206	81611	76867	59033	50.7688	39.53	-2.71967	58374	54300	53449	41.8658	34.6148	33.1002	164198	143238	55.4611	34.2815
-7.3	113188	119690	61.9093	68.9893	87877	84982	78415	65.6132	58.7548	43.1973	82609	70159	59856	84.9997	62.8409	44.5035	205768	181116	97.4667	72.5564
-7	126946	135159	76.8903	85.8334	94958	95902	83805	82.3885	84.6249	55.9665	81683	70736	69563	83.3516	63.8679	61.7802	183453	188644	74.9179	80.1633
-6.3	129036	127742	79.1661	77.7571	99025	93198	85362	92.0234	78.2189	59.6551	74041	77559	77928	69.7502	76.0116	76.6684	201719	184238	93.3753	75.7111
-6	148169	138668	100	89.6544	94480	100546	73413	81.2561	95.6267	31.3473	86172	76759	67720	91.3412	74.5877	58.5	204446	182848	96.1309	74.3066
-5.3	144563	142535	96.0734	93.8652	84036	98987	90139	56.5137	91.9334	70.972	87270	72633	72541	93.2954	67.2442	67.0805	208275	176465	100	67.8567
-5	147293	135059	99.0461	85.7246	94192	89575	74550	80.5738	69.6359	34.0409	89139	74462	71002	96.6219	70.4995	64.3413	198413	184070	90.0347	75.5414
-4.3	132575	140028	83.0197	91.1353	98658	99206	95363	91.154	92.4522	83.3479	86980	73780	63434	92.7793	69.2857	50.8717	196961	184735	88.5674	76.2133
-4	130943	131448	81.2426	81.7925	102392	94986	85547	100	82.4548	60.0933	91037	79882	68627	100	80.1461	60.1143	194081	168402	85.6573	59.7092
Basal Media (negative)	56333				60181						34851.5						109312
Negative data
	ArKP1.1 (Assay 1)						ArKP1.1 (Assay 2)						ArKP2.2 (Assay 1)						ArKP2.2 (Assay 2)						ArL-SALMFa mix (Assay 1)						ArL-SALMFa mix (Assay 2)						ArF-SALMFa mix (Assay 1)						ArF-SALMFa mix (Assay 2)						ArKP1.2 (assay 1)
	Raw data			Normalized			Raw data			Normalized			Raw data			Normalized			Raw data			Normalized			Raw data			Normalized			Raw data			Normalized			Raw data			Normalized			Raw data			Normalized			Raw data
-9	69838	79723	65771	-3.39242	4.53807	-6.65527	47549	48870	48587	-2.80193	-1.73878	-1.96654	75672	79188	60919	1.28805	4.10885	-10.5479	49997	54688	48167	-0.831767	2.94358	-2.30456	67777	75465	54548	-5.04591	1.12198	-15.6592	47678	51564	38911	-2.69811	0.429364	-9.75385	76267	72867	84446	1.76541	-0.962329	8.32722	48428	46301	42879	-2.09451	-3.80633	-6.56038
-8	70832	74033	69913	-2.59496	-0.0268762	-3.33225	49224	44791	47704	-1.45388	-5.02159	-2.67719	84049	74933	65277	8.00871	0.695172	-7.0516	56184	51562	45877	4.14757	0.427755	-4.14757	86206	75159	51853	9.73922	0.876486	-17.8213	56754	59174	40438	4.60631	6.55394	-8.52491	85711	76757	52004	9.34209	2.15852	-17.7002	44414	51862	38577	-5.325	0.669196	-10.0227
-7	84178	80841	64296	8.11221	5.43501	-7.83863	52890	45854	48919	1.49654	-4.16608	-1.69935	80438	72755	62008	5.1117	-1.05218	-9.67424	52849	50190	42978	1.46354	-0.67644	-6.4807	80798	81790	52138	5.40052	6.19637	-17.5927	54030	55366	43729	2.41402	3.48924	-5.87629	84960	67970	47419	8.73959	-4.89107	-21.3786	47120	53844	134448	-3.1472	2.26432	67.1349	179968
-6	72019	83207	67968	-1.64266	7.3332	-4.89268	48004	53651	51439	-2.43575	2.10899	0.328763	74594	74291	56947	0.4232	0.180111	-13.7346	53220	53906	47160	1.76212	2.31422	-3.115	75900	75250	53806	1.47097	0.949493	-16.2545	49232	46087	48775	-1.44744	-3.97856	-1.81524	81082	71742	50650	5.62836	-1.86489	-18.7865	51326	48201	38879	0.23782	-2.2772	-9.7796	198712
-5	70445	86667	63189	-2.90544	10.1091	-8.72675	47538	48688	58270	-2.81079	-1.88526	5.8264	76387	70912	57994	1.86168	-2.53078	-12.8946	45790	52012	43756	-4.21759	0.789917	-5.85456	77125	73204	51603	2.45376	-0.691962	-18.0219	55440	43720	59407	3.54879	-5.88354	6.74146	83732	62429	51566	7.75439	-9.33648	-18.0516	57756	46674	2654	5.41272	-3.50614	-38.9337	175994
-4	70820	78900	67715	-2.60459	3.8778	-5.09565	56780	53001	63582	4.62723	1.58587	10.1015	80632	76015	52215	5.26734	1.56323	-17.5309	51428	59875	42249	0.319911	7.11811	-7.06741	84828	76117	53010	8.63369	1.64507	-16.8931	48790	58811	48355	-1.80317	6.2618	-2.15326	71716	65425	41994	-1.88575	-6.93286	-25.731	47550	54567	2629	-2.80113	2.8462	-38.9538	190044
Basal Media (negative)	74066.5						51030.5						74066.5						51030.5						74066.5						51030.5						74066.5						51030.5						74066.5
[truncated: 7 more columns]

## Sheet: ArKPR2
	ArKP1.1 (Assay 1)						ArKP1.1 (Assay 2)						ArKP1.2 (Assay 1)						ArKP1.2 (Assay 2)						ArKP2.2 (Assay 1)						ArKP2.2 (Assay 2)						ArL-SALMFa Mix (Assay 1)						ArL-SALMFa Mix (Assay 2)						ArF-SALMFa Mix (Assay 1)
	Raw data			Normalized			Raw data			Normalized			Raw data			Normalized			Raw data			Normalized			Raw data			Normalized			Raw data			Normalized			Raw data			Normalized			Raw data			Normalized			Raw data
-9	86326	78139	54198	1.27875	0.861789	-0.35753	178210	179356	160258	0.381962	0.458669	-0.819648	85607	73033	43581	1.24214	0.60174	-0.898255	174380	195836	137200	0.125603	1.56175	-2.36303	89134	55648	40647	1.42177	-0.283681	-1.04768	180739	165054	150228	0.55124	-0.498629	-1.491	83962	51882	37222	1.15836	-0.475484	-1.22212	168290	173106	135331	-0.282029	0.0403281	-2.48813	74275
-8	89822	65117	46830	1.45681	0.198577	-0.732783	175696	184261	153603	0.213689	0.786984	-1.2651	91043	64845	42994	1.51899	0.184724	-0.928151	200563	187736	150984	1.87815	1.01958	-1.4404	85588	59139	38794	1.24117	-0.105884	-1.14206	183202	181340	172258	0.7161	0.591468	-0.0164324	76986	51567	39682	0.803067	-0.491527	-1.09683	191279	166722	135975	1.25673	-0.386982	-2.44502	72050
-7	102021	66584	45486	2.0781	0.273291	-0.801233	192249	182600	152481	1.32166	0.675805	-1.3402	80629	61732	44638	0.988605	0.0261781	-0.844422	163219	205780	158452	-0.621454	2.22735	-0.940532	78697	56990	40733	0.890208	-0.215333	-1.0433	177355	180178	162523	0.324733	0.51369	-0.668041	85821	52781	38384	1.25303	-0.429698	-1.16294	187801	165200	124260	1.02393	-0.488857	-3.22916	73601
-6	102097	69590	51882	2.08197	0.426387	-0.475484	173858	183034	148981	0.0906629	0.704855	-1.57447	83808	57905	40300	1.15051	-0.168732	-1.06536	190564	191368	161676	1.20887	1.26269	-0.724734	82972	57543	37677	1.10793	-0.187168	-1.19895	184064	176414	143668	0.773798	0.261748	-1.93009	85029	50460	34671	1.2127	-0.547907	-1.35204	175976	148636	136081	0.23243	-1.59756	-2.43793	83650
-5	92837	63939	45968	1.61036	0.138581	-0.776685	175454	186109	152210	0.197491	0.910679	-1.35834	77453	57334	46770	0.826851	-0.197813	-0.735839	171517	182171	156729	-0.066031	0.64709	-1.05586	80321	63283	43183	0.972919	0.105171	-0.918525	187142	170466	143229	0.979822	-0.136379	-1.95948	71488	48363	34256	0.523053	-0.654707	-1.37318	180626	167522	120858	0.543676	-0.333435	-3.45687	66320
-4	87553	72822	50419	1.34125	0.590994	-0.549995	179336	188971	154794	0.457331	1.10225	-1.18538	84186	60458	44635	1.16976	-0.0387069	-0.844575	187367	185247	159967	0.994883	0.852981	-0.839126	94049	58119	39758	1.67209	-0.157833	-1.09296	190179	180344	143790	1.1831	0.524801	-1.92193	77559	48997	33362	0.83225	-0.622418	-1.41871	192691	178692	142174	1.35124	0.414225	-2.03009	74774
Basal Media (negative)	61218						172504						61218						172504						61218						172504						61218						172504						61218
Bar plot data		ArKP1.1	ArKP1.2	ArKP2.2	ArL-SALMFa mix	ArF-SALMFa mix	Basal Media	Triton X-100
-5	Assay 1	92837	77453	80321	71488	66320	183582	2024691
		63939	57334	63283	48363	50928	161425
		45968	46770	43183	34256	27450
	Assay 2	175454	171517	187142	180626	162865	70576	1666499
		186109	182171	170466	167522	153824	51860
		152210	156729	143229	120858	158501
[truncated: 15 more columns]

## Sheet: ArKPR3
																						Bar plot data		ArKP1.1	ArKP1.2	ArKP2.2	ArL-SALMFa mix	ArF-SALMFa mix	Basal Media
	ArKP2.2 (Assay 1)						ArKP2.2 (Assay 2)						ArKP2.2 (Assay 3)				ArKP2.2 (Assay 4)					-5	Assay 1	125431	121660	253788	117564	123674	125142
	Raw data			Normalized			Raw data			Normalized			Raw data		Normalized		Raw data		Normalized					117177	119516		109658	108985	102829
-15	93861	86933	86719	6.52055	3.04747	2.94019	91936	164771	86092	-4.69262	17.0763	-6.43927	9248	6549	4.57138	-5.48688	102415	52681	4.25198	-28.1668				100872	83494		90179	71025
-14.3	106167	89825	94280	12.6897	4.49726	6.7306	103853	191235	84405	-1.13086	24.9859	-6.94348	9877	6649	6.91545	-5.11421	108111	66833	7.96488	-18.9419			Assay 2	155446	151524	250468	132456	135424	131965
-14	99951	81563	82099	9.57353	0.355429	0.624132	98350	167486	123081	-2.7756	17.8878	4.616	9537	7847	5.64839	-0.649669	105498	69055	6.26161	-17.4935				113486	110267		103734	105220	100598
-13.3	92308	83301	90178	5.74202	1.22671	4.67422	109490	155230	129967	0.553925	14.2247	6.67409	8932	5573	3.39376	-9.1241	102992	68213	4.62809	-18.0424				99562	90846		90651	89737
-13	93854	82422	84844	6.51704	0.786056	2.00023	89349	134843	97843	-5.46582	8.13143	-2.92713	10270	8746	8.38003	2.7006	119629	72945	15.4728	-14.9579
-12.3	102436	90250	94122	10.8193	4.71032	6.65139	111947	133346	149760	1.28827	7.68401	12.5898	10114	6200	7.79867	-6.78748	90721	78791	-3.37068	-11.1472
-12	106086	89891	80854	12.6491	4.53035	0	134231	174128	186795	7.94852	19.8729	23.6589	11731	9537	13.8247	5.64839	98507	81459	1.70457	-9.40806
-11.3	125012	137361	116907	22.1369	28.3276	18.0738	127618	157700	156181	5.97202	14.9629	14.5089	11147	8425	11.6483	1.50434	137816	91637	27.3279	-2.7736
-11	104123	96302	95829	11.665	7.74425	7.50713	218586	163217	242601	33.1606	16.6119	40.3381	19725	10207	43.6156	8.14525	102054	93483	4.01666	-1.57029
-10.3	157985	196506	192693	38.6666	57.9776	56.0661	155187	173967	205720	14.2119	19.8248	29.3152	10365	7190	8.73406	-3.09809	136383	121836	26.3938	16.9114
-10	151596	150169	131141	35.4637	34.7484	25.2094	165677	193628	193064	17.3471	25.7011	25.5325	15632	10292	28.3624	8.46202	103531	87680	4.97943	-5.35294
-9.3	197287	203922	211057	58.3691	61.6953	65.2722	242165	266148	252950	40.2078	47.3759	43.4313	11884	9351	14.3949	4.95523	147009	138957	33.3203	28.0717
-9	208238	226743	207656	63.859	73.1358	63.5672	257971	299935	324238	44.9319	57.4741	64.7378	21447	16620	50.0329	32.0443	137806	101824	27.3214	3.86674
-8.3	231391	213276	233203	75.4658	66.3846	76.3742	200817	233247	240620	27.8498	37.5424	39.7461	21264	21345	49.3509	49.6528	191328	157213	62.2094	39.9717
-8	213082	229413	229230	66.2873	74.4742	74.3825	275113	300247	306450	50.0553	57.5674	59.4213	24172	15668	60.1881	28.4965	191082	141367	62.049	29.6426
-7.3	230719	239168	236091	75.129	79.3645	77.822	268743	319099	362367	48.1515	63.2019	76.1338	29004	18623	78.1953	39.5088	213299	178590	76.531	53.9062
-7	239185	233772	247403	79.3731	76.6595	83.4928	290874	356469	402298	54.766	74.371	88.0684	26730	24563	69.7209	61.6452	216899	160892	78.8777	42.3698
-6.3	231248	242950	238302	75.3942	81.2605	78.9304	287684	339036	402279	53.8126	69.1607	88.0627	34855	24527	100	61.511	233092	172509	89.433	49.9423
-6	223641	246034	256217	71.5807	82.8065	87.9114	324380	339835	400012	64.7803	69.3995	87.3852	31313	22882	86.8002	55.3807	249303	188449	100	60.3327
-5.3	205098	264501	280331	62.2849	92.0643	100	262034	331854	414621	46.1463	67.0141	91.7515	30276	21313	82.9356	49.5336	209143	194172	73.822	64.0632
-5	236475	243280	271373	78.0145	81.4259	95.5092	267826	333255	442219	47.8774	67.4328	100	28847	35376	77.6102	101.942	223088	196647	82.9119	65.6765
-4.3	229172	252649	242515	74.3534	86.1227	81.0424	271315	302385	397026	48.9202	58.2064	86.4927	34109	32031	97.2199	89.4759	228185	187857	86.2344	59.9468
-4		245008	252332		82.2922	85.9638		317722	372496		62.7903	79.1612	29940	31626	81.6835	87.9666	230767	204310	87.9174	70.6716
Basal Media (negative)	88333						107637						8021.33				95892
	ArKP1.1 (Assay 1)						ArKP1.1 (Assay 2)						ArKP1.2 (Assay 1)						ArKP1.2 (Assay 2)						ArL-SALMFa mix (Assay 1)						ArL-SALMFa mix (Assay 2)						ArF-SALMFa mix (Assay 1)						ArF-SALMFa mix (Assay 2)						ArKP2.2 (assay 1)
	Raw data			Normalized			Raw data			Normalized			Raw data			Normalized			Raw data			Normalized			Raw data			Normalized			Raw data			Normalized			Raw data			Normalized			Raw data			Normalized			Raw data
-9	115297	114646	99639	0.938109	0.472452	-10.262	143216	123825	102549	17.2374	4.82764	-8.78843	115486	127921	93778	1.0733	9.96799	-14.4543	145610	121902	108937	18.7695	3.59697	-4.70028	119346	115098	101098	3.83434	0.795765	-9.21836	137883	114360	81083	13.8244	-1.22971	-22.5261	125112	105409	73179	7.95873	-6.13473	-29.1887	142582	114027	87603	16.8316	-1.44282	-18.3535
-8	110869	112544	99993	-2.22922	-1.0311	-10.0088	144091	126086	96592	17.7973	6.27462	-12.6008	120903	113897	89664	4.94805	-0.0633036	-17.397	137361	121119	97877	13.4903	3.09587	-11.7784	113376	112006	90115	-0.435972	-1.41593	-17.0744	134548	114029	85309	11.6901	-1.44154	-19.8216	113774	102319	78111	-0.151285	-8.34499	-25.6608	138224	119241	87375	14.0426	1.894	-18.4994
-7	119674	117485	102587	4.06895	2.50317	-8.15329	150813	128274	104324	22.0992	7.67488	-7.65248	127212	113131	93849	9.46085	-0.611219	-14.4035	144478	112148	96298	18.045	-2.64533	-12.7889	121222	108745	97049	5.17623	-3.7485	-12.1146	130924	116100	86592	9.37081	-0.116155	-19.0005	121510	100184	73927	5.38224	-9.87214	-28.6536	142839	109795	83371	16.9961	-4.15119	-21.0618	231199
-6	125579	108758	90605	8.29277	-3.7392	-16.7239	148234	124118	97067	20.4487	5.01515	-12.2968	117860	118901	83009	2.77141	3.51603	-22.1573	139202	119780	94873	14.6685	2.23895	-13.7009	121770	112303	86733	5.56821	-1.20348	-19.4936	146601	108075	87124	19.4037	-5.25194	-18.66	130375	105191	82568	11.7233	-6.29066	-22.4728	140636	95835	88906	15.5862	-13.0852	-17.5196	252556
-5	125431	117177	100872	8.18691	2.28286	-9.38002	155446	113486	99562	25.0642	-1.78905	-10.7	121660	119516	83494	5.48953	3.95594	-21.8104	151524	110267	90846	22.5543	-3.84912	-16.278	117564	109658	90179	2.55968	-3.09544	-17.0287	132456	103734	90651	10.3512	-8.03007	-16.4028	123674	108985	71025	6.93013	-3.57683	-30.7294	135424	105220	89737	12.2507	-7.07907	-16.9878	253788
-4	124597	129275	97997	7.59035	10.9365	-11.4365	159035	126086	105933	27.3611	6.27462	-6.62276	125230	111576	91511	8.04313	-1.7235	-16.0759	139370	110477	88541	14.776	-3.71473	-17.7532	117520	109526	74420	2.52821	-3.18986	-28.301	147744	108338	92378	20.1352	-5.08363	-15.2976	126759	97997	71775	9.13682	-11.4365	-30.193	135988	95127	80068	12.6116	-13.5383	-23.1757	242971
Basal Media (negative)	113986						116282						113986						116282						113986						116282						113986						116282						113986
[truncated: 3 more columns]

## Sheet: ArKPR4
	ArKP1.1 (Assay 1)						ArKP1.1 (Assay 2)						ArKP1.2 (Assay 1)						ArKP1.2 (Assay 2)						ArKP2.2 (Assay 1)						ArKP2.2 (Assay 2)						ArL-SALMFa Mix (Assay 1)						ArL-SALMFa Mix (Assay 2)						ArF-SALMFa Mix (Assay 1)
	Raw data			Normalized			Raw data			Normalized			Raw data			Normalized			Raw data			Normalized			Raw data			Normalized			Raw data			Normalized			Raw data			Normalized			Raw data			Normalized			Raw data
-9	148734	121033	65534	1.9649	0.121544	-3.57163	59210	42528	41655	1.41204	0.190274	0.126336	167553	90903	55279	3.21721	-1.88345	-4.25405	48113	46653	40763	0.599311	0.492382	0.0610077	135936	109540	52126	1.11326	-0.643256	-4.46387	39119	27166	32108	-0.0593964	-0.934816	-0.572872	138487	95918	31171	1.28302	-1.54973	-5.85831	39338	40853	16128	-0.0433572	0.0675991	-1.74322	93831
-8	234889	142278	88019	7.69808	1.53529	-2.07537	58117	44459	48833	1.33199	0.331697	0.652042	156569	79099	59946	2.48628	-2.66895	-3.94348	60074	43902	36877	1.47532	0.290903	-0.223597	130942	111494	51878	0.780938	-0.513228	-4.48037	44237	31027	19885	0.315438	-0.652042	-1.46807	98729	133263	47368	-1.36267	0.935389	-4.78049	35314	39953	17454	-0.338069	0.00168449	-1.64611	96701
-7	237275	75678	57563	7.85686	-2.8966	-4.10206	87007	37846	43771	3.44785	-0.152629	0.281309	133517	82242	76110	0.952291	-2.4598	-2.86785	50772	37263	34301	0.794052	-0.195327	-0.41226	112901	118710	62760	-0.419599	-0.0330395	-3.75623	48652	50242	19827	0.638786	0.755235	-1.47231	164522	63007	56337	3.01552	-3.73979	-4.18365	30366	35416	20951	-0.700453	-0.330599	-1.38999	89923
-6	173541	70993	79005	3.61568	-3.20836	-2.67521	58091	44403	36486	1.33008	0.327596	-0.252233	163510	76888	37294	2.94817	-2.81608	-5.45086	54367	35019	37425	1.05734	-0.359674	-0.183462	139706	97390	42023	1.36414	-1.45178	-5.13617	51314	36486	18644	0.833747	-0.252233	-1.55895	166807	73923	56617	3.16757	-3.01339	-4.16501	35154	38515	21420	-0.349787	-0.103632	-1.35564	102374
-5	194069	129772	76298	4.98172	0.70308	-2.85534	50318	37760	40441	0.760802	-0.158928	0.0374249	162861	87880	86789	2.90498	-2.08462	-2.15722	39964	39263	31821	0.00249011	-0.0488501	-0.593891	191930	84735	57820	4.83938	-2.2939	-4.08496	45608	44966	20367	0.415848	0.368829	-1.43276	92018	79150	64272	-1.80926	-2.66556	-3.65561	38593	30345	14951	-0.0979199	-0.701991	-1.82942	113407
-4	215138	81821	80276	6.38375	-2.48781	-2.59063	56013	47903	43895	1.17789	0.583931	0.290391	125128	93439	47837	0.394046	-1.7147	-4.74928	40605	34321	30345	0.049436	-0.410795	-0.701991	214358	117022	70219	6.33185	-0.145367	-3.25987	67833	59917	30211	2.04357	1.46382	-0.711805	87821	79000	64956	-2.08855	-2.67554	-3.61009	40718	38755	19259	0.0577119	-0.0860552	-1.51391	110349
Basal Media (negative)	119206						39930						119206						39930						119206						39930						119206						39930						119206
Bar plot data		ArKP1.1	ArKP1.2	ArKP2.2	ArL-SALMFa mix	ArF-SALMFa mix	Basal Media	Triton X-100
-5	Assay 1	194069	162861	191930	92018	113407	133899	1621951
		129772	87880	84735	79150	59172	104514
		76298	86789	57820	64272	42846
	Assay 2	50318	39964	45608	38593	37619	40895	1405332
		37760	39263	44966	30345	32737	38965
		40441	31821	20367	14951	15475
[truncated: 15 more columns]

## Sheet: ArKPR5
	ArKP1.1 (Assay 1)						ArKP1.1 (Assay 2)						ArKP1.2 (Assay 1)						ArKP1.2 (Assay 2)						ArKP2.2 (Assay 1)						ArKP2.2 (Assay 2)						ArL-SALMFa Mix (Assay 1)						ArL-SALMFa Mix (Assay 2)						ArF-SALMFa Mix (Assay 1)
	Raw data			Normalized			Raw data			Normalized			Raw data			Normalized			Raw data			Normalized			Raw data			Normalized			Raw data			Normalized			Raw data			Normalized			Raw data			Normalized			Raw data
-9	63233	55070	31716	0.44151	-0.00235627	-1.27224	58425	95245	95639	-10.1513	-4.4003	-4.33876	56302	58935	44027	0.0646343	0.207805	-0.602824	71053	91412	86493	-8.17888	-4.99898	-5.76729	58014	67534	38386	0.157725	0.675379	-0.909556	82963	99655	73437	-6.31864	-3.7115	-7.80652	46458	61268	24480	-0.470638	0.334663	-1.6657	75330	105230	49281	-7.51085	-2.84073	-11.5795	57501
-8	68347	59530	42499	0.719586	0.240158	-0.68591	62316	92935	97925	-9.54352	-4.7611	-3.98171	56795	48306	55127	0.0914414	-0.370152	0.000743131	65780	91560	86971	-9.00248	-4.97586	-5.69263	59655	70952	49511	0.246955	0.861234	-0.304629	96146	100412	69224	-4.25957	-3.59326	-8.46455	41586	49705	30203	-0.735555	-0.29408	-1.35451	86326	113035	42825	-5.79337	-1.62166	-12.5878	59050
-7	62176	54856	43454	0.384036	-0.0139926	-0.633981	74699	86399	89179	-7.60941	-5.78197	-5.34776	47717	51526	39990	-0.402179	-0.195063	-0.822338	60241	108474	99207	-9.86762	-2.33404	-3.78147	60681	44623	38894	0.302744	-0.570416	-0.881933	88311	97378	59332	-5.48333	-4.06714	-10.0096	39295	54490	19699	-0.860129	-0.033894	-1.92567	92963	100722	41891	-4.75673	-3.54484	-12.7337	42821
-6	50626	54265	42288	-0.244001	-0.0461285	-0.697383	74035	82686	90592	-7.71312	-6.36191	-5.12706	62465	69254	34919	0.39975	0.768905	-1.09808	77295	97376	83586	-7.20393	-4.06746	-6.22133	54617	57854	41563	-0.0269883	0.149025	-0.736805	81865	107506	69760	-6.49014	-2.48524	-8.38084	57033	55141	20977	0.104383	0.00150439	-1.85618	92009	95020	41627	-4.90573	-4.43544	-12.775	67083
-5	69574	56708	43033	0.786305	0.0867107	-0.656873	71243	102217	90628	-8.1492	-3.31133	-5.12143	66451	68383	52488	0.616491	0.721544	-0.142754	84718	125311	85965	-6.04453	0.295748	-5.84975	44253	65143	32788	-0.590535	0.545368	-1.21395	81913	125954	52157	-6.48264	0.396179	-11.1303	53662	48319	25402	-0.0789169	-0.369445	-1.61557	93222	110638	38775	-4.71627	-1.99605	-13.2204	99347
-4	63459	62032	46044	0.453799	0.376206	-0.493149	74548	106532	99942	-7.63299	-2.63737	-3.66667	96760	94410	67076	2.26456	2.13677	0.650475	139242	164925	130092	2.47165	6.48311	1.0425	66049	54357	31666	0.594632	-0.041126	-1.27496	97108	109718	50848	-4.10932	-2.13974	-11.3347	67947	67822	32831	0.697836	0.691039	-1.21161	107702	127181	42804	-2.45462	0.587826	-12.5911	137804
Basal Media (negative)	55113.3						123418						55113.3						123418						55113.3						123418						55113.3						123418						55113.3
Bar plot data		ArKP1.1	ArKP1.2	ArKP2.2	ArL-SALMFa mix	ArF-SALMFa mix	Basal Media	Triton X-100
-5	Assay 1	69574	66451	44253	53662	99347	66772	1894179
		56708	68383	65143	48319	77648	63434
		43033	52488	32788	25402	30501	35134
	Assay 2	71243	84718	81913	93222	164605		763658
		102217	125311	125954	110638	155696
		90628	85965	52157	38775	53934
[truncated: 15 more columns]

## Sheet: ArKPR6
																										Bar plot data		ArKP1.1	ArKP1.2	ArKP2.2	ArL-SALMFa mix	ArF-SALMFa mix	Basal Media
	ArF-SALMFa (assay 1)						ArF-SALMFa (assay 2)						ArF-SALMFa (assay 3)						ArF-SALMFa (assay 4)							-5	Assay 1	178136	178146	285207	220865	298158	86653
	Raw Data			Normalized			Raw Data			Normalized			Raw Data			Normalized			Raw Data			Normalized						153504	183065	195048	253067	298199	86134
-15	83588	92507	113984	-7.57848	-4.1046	4.26052	50850	50027	44855	0.583306	0.332665	-1.24244	119956	147359	121305	-1.46699	5.23411	-1.13711	85673	99948	120623	-14.042	-4.16424	10.1421				152161	142980	222742	171868	336229
-14.3	90489	103923	115933	-4.89059	0.341844	5.01964	57412	48827	39090	2.58173	-0.0327894	-2.99815	125292	137488	115504	-0.162129	2.82027	-2.55568	100212	107578	106396	-3.98157	1.11545	0.297545			Assay 2	188693	207684	204819	187344	313970	87776
-14	91829	91665	131227	-4.36867	-4.43255	10.9765	51105	83800	43543	0.660965	10.6181	-1.64201	132555	107923	120808	1.61396	-4.40952	-1.25864	101101	104111	122111	-3.36641	-1.28359	11.1718				192100	183758	165953	176010		76283
-13.3	101298	112883	109740	-0.680572	3.83169	2.60752	45903	53229	33839	-0.92328	1.30782	-4.59731	148456	126252	115598	5.50237	0.072628	-2.53269	94815	100864	125627	-7.7161	-3.5304	13.6047				155004	153910	151700	113512
-13	83508	99494	108170	-7.60964	-1.38322	1.99602	62302	44684	40284	4.07096	-1.29452	-2.63452	144682	121923	112828	4.57948	-0.985981	-3.21006	98945	103136	108904	-4.85829	-1.95826	2.03299
-12.3	91574	101853	104665	-4.46799	-0.464404	0.630847	52309	42388	35557	1.02764	-1.99376	-4.07411	110784	127078	117923	-3.7099	0.274617	-1.96414	105606	102015	132485	-0.249107	-2.73395	18.3502
-12	85485	108581	109690	-6.83961	2.1561	2.58804	48295	40626	38701	-0.194808	-2.53037	-3.11662	133649	123885	118221	1.88148	-0.506195	-1.89126	111380	96668	111708	3.7463	-6.43389	3.97326
-11.3	86413	104170	114784	-6.47816	0.438049	4.57212	54286	45325	35508	1.62972	-1.09931	-4.08903	125400	129142	119930	-0.135719	0.779345	-1.47335	110916	104553	111360	3.42523	-0.977746	3.73246
-11	93636	99189	122335	-3.66486	-1.50201	7.51317	68359	64720	46645	5.91559	4.80735	-0.697307	153465	140777	164964	6.72726	3.62455	9.53922	119316	103781	103598	9.23773	-1.51194	-1.63857		In green highlight or blue numbers are data that are considered abnormal measurements
-10.3	93350	104415	127842	-3.77625	0.533474	9.6581	62411	62974	50208	4.10415	4.27561	0.387788	138274	145139	133801	3.01247	4.69123	1.91865	111348	120147	106663	3.72416	9.81275	0.4823
-10	98946	112817	132450	-1.59666	3.80599	11.4529	158779	190692	145439	33.4526	43.1715	29.3899	270649	240668	267053	35.3833	28.0518	34.5039	111846	124088	122097	4.06875	12.5398	11.1621
-9.3	120974	153239	177095	6.98307	19.55	28.8418	108288	122367	96972	18.0758	22.3635	14.6295	211390	223338	221292	20.8922	23.8139	23.3136	131162	153688	144027	17.4347	33.0219	26.3369
-9	143369	163897	219244	15.7057	23.7012	45.2585	254026	237025	187052	62.4596	57.282	42.063	358177	350598	351604	56.7873	54.9339	55.1799	138008	168933	125572	22.1719	43.571	13.5667
-8.3	179517	209072	248176	29.7851	41.2965	56.5272	222615	227768	195160	52.8935	54.4629	44.5322	337446	347590	324407	51.7178	54.1984	48.5292	150047	192437	170662	30.5025	59.8349	44.7674
-8	209156	239007	269072	41.3293	52.956	64.6661	377293	317532	251402	100	81.8001	61.6605	424148	446965	411078	72.9198	78.4994	69.7236	164236	185503	172579	40.3208	55.0368	46.0939
-7.3	253842	276652	310111	58.7341	67.6184	80.6504	277653	253212	224737	69.6551	62.2117	53.5398	408270	378799	409163	69.037	61.8302	69.2554	203099	232382	167984	67.2126	87.4754	42.9143
-7	251065	266154	330404	57.6525	63.5295	88.5544	306350	316004	252290	78.3946	81.3347	61.9309	392882	429281	375007	65.274	74.175	60.9029	202242	241243	154150	66.6196	93.6069	33.3416
-6.3	270456	301092	346169	65.2051	77.1376	94.6947	355876	346035	286957	93.4776	90.4805	72.4886	444717	430321	452225	77.9497	74.4293	79.7857	189235	218179	136576	57.6192	77.6475	21.181
-6	269765	315591	359790	64.936	82.7848	100	328811	295704	259683	85.235	75.1525	64.1824	437946	460931	416099	76.2939	81.9146	70.9515	220183	250482	158335	79.0342	100	36.2375
-5.3	278942	301315	354067	68.5103	77.2245	97.7709	353132	307476	263107	92.6419	78.7376	65.2252	534888	453095	417374	100	79.9984	71.2633	208594	228932	153878	71.015	85.0882	33.1534
-5	276861	288815	333938	67.6998	72.3558	89.9309	327590	321083	239228	84.8632	82.8815	57.9529	454584	437678	451902	80.3626	76.2284	79.7067	213317	232876	184743	74.2831	87.8173	54.5109
-4.3	249985	306366	336413	57.2318	79.1918	90.8948	331254	306268	225296	85.979	78.3697	53.71	437500	443003	469089	76.1849	77.5305	83.9096	193198	225778	170668	60.3615	82.9057	44.7715
-4	272192	308726	354430	65.8813	80.111	97.9123	332952	298107	223927	86.4962	75.8843	53.2931	396829	429977	436167	66.2392	74.3452	75.8589	202284	243828	165398	66.6487	95.3957	41.1249
Basal Media (negative)	103045						48934.7						112036						125955
	S2.3 (assay 1)						F-SALMFa mix		S2.3 (assay 2)						F-SALMFa mix		S2.3 (assay 3)						F-SALMFa mix		S2.3 (assay 4)						F-SALMFa mix
	Raw Data			Normalized			Raw Data	Normalized	Raw Data			Normalized			Raw Data	Normalized	Raw Data			Normalized			Raw Data	Normalized	Raw Data			Normalized			Raw Data	Normalized
-15	112871	107174	103014	0.419306	-2.29112	-4.2703			139939	151038	131773	-5.55966	-2.40868	-7.87797			74547	81580	69282	-4.90622	0.25463	-8.7697			44907	54738	55998	-6.92366	-1.94537	-1.30732
-14.3	94907	105912	119766	-8.12731	-2.89153	3.6997			194386	174205	145481	9.89771	4.16837	-3.9863			83006	73854	63862	1.30104	-5.41475	-12.7469			49524	50316	59623	-4.58567	-4.18462	0.528331
-14	97487	105441	142650	-6.89984	-3.11562	14.5871			148939	154295	167579	-3.00458	-1.48403	2.28727			77412	98669	76107	-2.80387	12.7946	-3.76148			51840	56444	65045	-3.41288	-1.08147	3.27396
-13.3	107481	98145	108262	-2.14506	-6.58679	-1.77349			158652	173452	165193	-0.247086	3.9546	1.60989			77860	95469	66861	-2.47512	10.4464	-10.5462			59732	54288	61226	0.583527	-2.17325	1.34007
-13	95666	104076	108074	-7.76621	-3.76504	-1.86293			152515	188001	135256	-1.98937	8.08503	-6.88915			74660	83921	67751	-4.8233	1.97247	-9.89316			68712	102326	57222	5.13088	22.1526	-0.687505
-12.3	98773	101195	121400	-6.28801	-5.13571	4.4771			182514	153263	142204	6.52728	-1.77701	-4.91663			79458	92241	80584	-1.3025	8.07772	-0.476239			61016	75175	59285	1.23373	8.40366	0.357172
-12	98758	103288	120423	-6.29515	-4.13994	4.01227			148990	150157	148343	-2.9901	-2.6588	-3.17379			75903	79233	72362	-3.91118	-1.46761	-6.50958			54748	71448	60489	-1.94031	6.51636	0.966862
-11.3	106809	108477	122119	-2.46477	-1.6712	4.81917			177512	154190	183474	5.10722	-1.51384	6.79982			81337	85535	65714	0.0763157	3.15683	-11.3879			55531	65944	72261	-1.54381	3.7292	6.92805
-11	101614	111711	102220	-4.93637	-0.13258	-4.64805			142023	155538	142542	-4.96802	-1.13114	-4.82068			79685	77566	73018	-1.13593	-2.69086	-6.02821			64133	59998	57935	2.81214	0.718226	-0.326451
-10.3	119755	102453	122410	3.69446	-4.5372	4.95762			147925	162614	131297	-3.29246	0.877717	-8.0131			82795	77953	77146	1.1462	-2.40688	-2.99906			61535	63233	67977	1.49654	2.35639	4.75869
-10	95803	113636	116940	-7.70103	0.783266	2.35519			146009	158466	164130	-3.8364	-0.299891	1.30811			81673	80735	68791	0.322874	-0.365435	-9.13			57270	59682	71665	-0.663198	0.558208	6.62625
-9.3	121631	122132	133928	4.587	4.82536	10.4375			172461	183131	151491	3.67326	6.70244	-2.28008			80680	79771	78318	-0.405794	-1.07282	-2.13904			67504	65131	77601	4.51917	3.31751	9.63216
-9	140968	151224	154676	13.7868	18.6663	20.3086			193514	199599	164964	9.65015	11.3777	1.54488			79143	72121	72760	-1.53365	-6.68643	-6.21753			245208	66229	67077	94.5062	3.87352	4.30294
-8.3	174088	201379	210205	29.5441	42.5282	46.7273			246214	253062	223868	24.6116	26.5557	18.2676			91031	94734	72764	7.18982	9.9071	-6.21459			152065	146610	196923	47.3398	44.5774	70.0553
-8	227672	233280	235668	55.0375	57.7055	58.8417			271576	311913	303382	31.8118	43.2633	40.8414			102112	104036	102366	15.3211	16.733	15.5075			144805	167399	169371	43.6634	55.1047	56.1033
-7.3	241567	265847	281211	61.6482	73.1997	80.5094			348590	365954	332671	53.6759	58.6055	49.1565			129236	137680	123072	35.2248	41.4211	30.7017			226782	267019	244760	85.1755	105.551	94.2793
-7	275057	293042	323639	77.5815	86.1381	100.695	285111	82.3649	415013	359345	383878	72.5332	56.7292	63.694	475102	89.5923	142213	132313	138271	44.7474	37.4828	41.8548	172720	67.1336	209093	250386	285174	76.218	97.1283	114.744	235908	89.7968
-6.3	295735	331954	337025	87.4194	104.651	107.064			467349	429082	443474	87.3913	76.5273	80.6132			156394	156158	189462	55.1535	54.9803	79.419			258431	276836	320846	101.202	110.522	132.808
-6	308187	355225	353827	93.3436	115.723	115.057	322178	100	490783	471021	440381	94.0441	88.4337	79.7351	485864	92.6476	162082	165692	170832	59.3274	61.9764	65.7482	207178	92.4191	264835	338146	403755	104.445	141.569	174.792	233215	88.4331
-5.3	300443	369375	384241	89.6593	122.455	129.527			543639	505486	541417	109.05	98.2183	108.419			191284	189714	187600	80.756	79.6039	78.0526			267867	316093	354426	105.98	130.401	149.813
-5	361603	388068	387834	118.757	131.348	131.237	303258	90.9985	515611	542889	556417	101.093	108.837	112.677	511762	100	217512	200206	202433	100.002	87.303	88.9372	217509	100	288241	362199	334129	116.298	153.749	139.535	249966	96.9156
-4.3	294331	366299	363346	86.7514	120.991	119.586			471695	495848	513079	88.6251	95.4821	100.374			195907	188949	217138	84.1483	79.0425	99.7278			334940	358265	348293	139.945	151.757	146.707
-4	310130	351185	332974	94.268	113.8	105.136	305647	92.1351	499404	521568	473469	96.4916	102.784	89.1287	465185	86.7769	212453	179261	188303	96.2899	71.9334	78.5685	190938	80.5021	277479	313884	322319	110.848	129.283	133.554	256057	100
Basal Media (negative)	111990								159522								81233								58579.7
	ArKP1.1 (Assay 1)						ArKP1.1 (Assay 2)						ArKP1.2 (Assay 1)						ArKP1.2 (Assay 2)						ArKP2.2 (Assay 1)						ArKP2.2 (Assay 2)						ArL-SALMFa mix (Assay 1)						ArL-SALMFa mix (Assay 2)						ArF-SALMFa mix (Assay 1)
	Raw data			Normalized			Raw data			Normalized			Raw data			Normalized			Raw data			Normalized			Raw data			Normalized			Raw data			Normalized			Raw data			Normalized			Raw data			Normalized			Raw data
-9	117636	68169	81307	12.3153	-7.18378	-2.00501	136078	111103	96458	23.3027	12.5349	6.22078	110911	87878	80508	9.66437	0.585164	-2.31996	107997	105553	90167	11.1958	10.142	3.50844	102241	80599	109774	6.24681	-2.28409	9.21619	114613	94203	80166	14.0482	5.24854	-0.803439	105661	102503	68668	7.59491	6.35009	-6.98708	91054	89530	78360	3.89087	3.2338	-1.58209
-8	105261	93343	78772	7.43724	2.73937	-3.00426	131141	122779	94623	21.1742	17.5689	5.42963	103383	75326	81762	6.69697	-4.36262	-1.82566	112162	102127	69299	12.9915	8.66494	-5.48869	88317	70660	118846	0.75821	-6.20187	12.7922	118845	91612	73522	15.8728	4.13145	-3.66797	87645	93146	90894	0.49332	2.66172	1.77402	123495	128674	66737	17.8776	20.1105	-6.59329
-7	92067	81456	65752	2.2364	-1.94628	-8.13652	120183	114311	100470	16.4497	13.918	7.95053	87457	94921	84529	0.419213	3.36139	-0.734954	110183	87159	79968	12.1382	2.21156	-0.888806	132359	121313	116221	18.1188	13.7647	11.7575	140139	156092	113147	25.0536	31.9317	13.4162	114242	149951	124819	10.9774	25.0533	15.1467	139711	111801	101938	24.8691	12.8358	8.58345	298298
-6	138071	97482	94603	20.3704	4.37089	3.23604	153119	158360	123983	30.6499	32.9095	18.088	130153	153191	121390	17.2492	26.3304	13.795	159271	142670	111020	33.3023	26.1449	12.4991	173984	138350	155273	34.5267	20.4804	27.1511	186575	161998	114939	45.0743	34.478	14.1888	155306	205141	132885	27.1641	46.8082	18.3261	178370	145308	100499	41.5367	27.2822	7.96303	330328
-5	178136	153504	152161	36.1633	26.4538	25.9244	188693	192100	155004	45.9874	47.4564	31.4626	178146	183065	142980	36.1672	38.1062	22.3054	207684	183758	153910	54.1753	43.8597	30.9909	285207	195048	222742	78.3688	42.8297	53.7462	204819	165953	151700	52.9401	36.1832	30.0381	220865	253067	171868	53.0063	65.6998	33.6926	187344	176010	113512	45.4058	40.5192	13.5735	298158
-4	238815	258512	260303	60.0819	67.8461	68.5521	250526	214147	200263	72.6464	56.9618	50.9758	229218	223416	224335	56.2989	54.0119	54.3741	240238	249862	172761	68.2108	72.3602	39.1184	308084	249662	277670	87.3865	64.3576	75.3979	218838	189710	141933	58.9843	46.4259	25.8271	266210	277896	236026	70.8805	75.487	58.9825	178903	180821	148383	41.7665	42.5935	28.608	317042
Basal Media (negative)	86393.5						82029.5						86393.5						82029.5						86393.5						82029.5						86393.5						82029.5						86393.5
[truncated: 7 more columns]

## Sheet: ArKPR7
																										Bar plot data		ArKP1.1	ArKP1.2	ArKP2.2	ArL-SALMFa mix	ArF-SALMFa mix	Basal Media
	ArL-SALMFa (assay 1)						ArL-SALMFa (assay 2)						ArL-SALMFa (assay 3)						ArL-SALMFa (assay 4)							-5	Assay 1	101585	82672	52952	266562	83807	51170
	Raw Data			Normalized			Raw Data			Normalized			Raw Data			Normalized			Raw Data			Normalized						101699	74157	50944	163966	161519	31030
-15	121268	96974	113295	8.95025	-2.72675	5.118	55868	94795	54030	-1.10015	15.736	-1.8951	58292	49570	46240	2.97875	-3.67386	-6.21379	70071	63408	49925	6.07951	2.0646	-6.05983				67504	67685	32597		67801
-14.3	112707	113385	103686	4.83538	5.16126	0.499399	63496	63138	59324	2.19901	2.04417	0.39459	53056	50416	43181	-1.01495	-3.02858	-8.54701	65224	55066	45129	3.15886	-2.96202	-8.94974			Assay 2	166158	141651	110344	146962	115546	61001
-14	118840	96637	94938	7.78323	-2.88873	-3.70536	69506	59320	54483	4.79837	0.39286	-1.69917	56672	57219	49969	1.74311	2.16033	-3.36953	67813	56711	50121	4.71891	-1.9708	-5.94172				132781	103761	97873	306757	85701	40043
-13.3	103587	105828	93264	0.451814	1.52896	-4.50997	65007	54647	55132	2.85253	-1.62824	-1.41848	50609	44957	49449	-2.88138	-7.19238	-3.76615	62398	50627	51676	1.45601	-5.63682	-5.00473
-13	99135	104869	92680	-1.68806	1.06801	-4.79068	61334	58054	56032	1.26393	-0.154693	-1.02922	55583	47454	40800	0.912491	-5.28782	-10.3631	56442	52305	45322	-2.13289	-4.62571	-8.83345
-12.3	110188	93752	106310	3.62461	-4.27541	1.76063	64338	51611	52496	2.56318	-2.94133	-2.55857	58861	52434	40004	3.41275	-1.48938	-10.9702	61549	50898	46018	0.944425	-5.47353	-8.41406
-12	112781	101569	93524	4.87094	-0.518145	-4.385	61834	55912	58417	1.48018	-1.08112	0.0023067	50418	44546	42403	-3.02706	-7.50587	-9.14042	58734	56806	42902	-0.751804	-1.91356	-10.2917
-11.3	105557	116067	92105	1.3987	6.45037	-5.06705	60149	54227	57520	0.751408	-1.8099	-0.385652	63432	49572	49613	6.89923	-3.67234	-3.64106	60248	54618	48587	0.160484	-3.23197	-6.86606
-11	109632	95405	103294	3.35737	-3.48089	0.310983	61003	61034	48912	1.12077	1.13418	-4.10867	54806	47472	42204	0.319842	-5.27409	-9.2922	64216	53372	51239	2.55147	-3.98277	-5.26805
-10.3	113889	108500	104799	5.40351	2.81327	1.03437	61714	67909	57548	1.42828	4.10766	-0.373542	62636	54468	39731	6.29209	0.0620362	-11.1785	62165	55031	50618	1.31561	-2.98311	-5.64225		In green highlight or blue numbers are data that are considered abnormal measurements
-10	118498	115359	119426	7.61884	6.11007	8.06489	69844	65956	63346	4.94456	3.26297	2.13413	65747	63651	44916	8.66498	7.06627	-7.22365	65182	60260	52791	3.13356	0.167715	-4.33287
-9.3	162203	166711	147603	28.6258	30.7926	21.6083	113882	105097	103994	23.9913	20.1917	19.7147	80074	91420	79072	19.5927	28.2468	18.8285	104185	103612	88404	26.6355	26.2902	17.1264
-9	189382	179960	179416	41.6895	37.1608	36.8993	132694	130207	122391	32.1276	31.052	27.6715	109724	101670	98382	42.208	36.0649	33.557	135625	119437	106629	45.5803	35.8259	28.1082
-8.3	198743	216087	203211	46.1889	54.5254	48.3365	169341	189158	159534	47.9777	56.5487	43.7361	123882	127831	123971	53.0068	56.0189	53.0747	168849	145294	137023	65.6	51.4065	46.4227
-8	224902	223825	244632	58.7623	58.2447	68.2456	181187	182056	168594	53.1011	53.477	47.6546	137315	140395	125222	63.2527	65.602	54.0289	180556	171990	148309	72.6543	67.4927	53.2232
-7.3	243215	274326	268776	67.5645	82.5181	79.8505	227413	220679	208074	73.0942	70.1817	64.73	185493	166195	150343	100	85.2807	73.1897	201350	190523	176228	85.1841	78.66	70.0463
-7	260375	306920	250852	75.8125	98.1846	71.2353	228456	225423	221232	73.5453	72.2335	70.4209	161055	152031	160187	81.3602	74.4772	80.6981	206971	198263	167459	88.5711	83.3239	64.7624
-6.3	259540	310697	274572	75.4112	100	82.6364	234177	262953	247183	76.0197	88.4655	81.6449	179818	178599	156276	95.6715	94.7417	77.715	211228	216238	187734	91.1362	94.1551	76.9795
-6	292420	293845	277355	91.2151	91.9	83.974	256337	246881	235448	85.604	81.5142	76.5694	168038	165233	168566	86.6864	84.5469	87.0891	218357	220506	190707	95.4319	96.7268	78.7709
-5.3	285452	294327	299533	87.8659	92.1317	94.634	256378	267579	254488	85.6217	90.4663	84.8043	173972	181533	170032	91.2125	96.9796	88.2073	210348	215991	182880	90.606	94.0063	74.0546
-5	273887	285980	302689	82.3071	88.1197	96.1509	234037	289622	257418	75.9591	100	86.0716	172004	176060	162407	89.7114	92.8051	82.3914	212678	225938	179495	92.0099	100	72.0149
-4.3	287112	280793	287582	88.6638	85.6265	88.8897	231139	251911	242071	74.7057	83.6897	79.4339	178484	160540	158714	94.654	80.9674	79.5746	215043	223525	168221	93.435	98.546	65.2216
-4	267730	295225	277507	79.3478	92.5633	84.0471	237862	258305	245223	77.6135	86.4552	80.7971	184038	160658	142156	98.8902	81.0574	66.9452	195490	187458	170504	81.653	76.8132	66.5972
Basal Media (negative)	102647						58411.7						54386.7						59981.7
	S1.4 (assay 1)						L-SALMFa mix		S1.4 (assay 2)						L-SALMFa mix		S1.4 (assay 3)						L-SALMFa mix		S1.4 (assay 4)						L-SALMFa mix
	Raw Data			Normalized			Raw Data	Normalized	Raw Data			Normalized			Raw Data	Normalized	Raw Data			Normalized			Raw Data	Normalized	Raw Data			Normalized			Raw Data	Normalized
-15	169686	161331	111132	5.33884	4.01041	-3.97114			192695	122110	109422	3.02795	-8.52469	-10.6013			74746	72910	66471	6.46455	5.19206	0.729347			77836	71004	59408	11.0826	5.07321	-5.12657
-14.3	164898	150127	94934	4.57756	2.229	-6.54659			208924	158100	112818	5.68414	-2.63421	-10.0455			87237	71675	72383	15.1218	4.33611	4.82681			77885	71264	72503	11.1257	5.30191	6.39172
-14	151030	140648	92424	2.37257	0.721852	-6.94568			210308	146395	107802	5.91066	-4.54997	-10.8665			83302	65757	66574	12.3945	0.234491	0.800734			82058	72351	62659	14.7963	6.25803	-2.26701
-13.3	164043	151651	117618	4.44161	2.47131	-2.93988			173967	138356	104245	-0.0372622	-5.86571	-11.4486			93214	71887	67193	19.2643	4.48305	1.22975			73181	92315	68911	6.98809	23.8183	3.23222
-13	165748	136440	95847	4.71271	0.0527874	-6.40143			181408	143126	108972	1.1806	-5.085	-10.675			84850	75801	63468	13.4674	7.19575	-1.35196			77437	85098	56923	10.7316	17.4702	-7.31237
-12.3	159665	145831	96005	3.74552	1.54594	-6.3763			199428	126070	117220	4.12993	-7.87655	-9.32503			72033	66033	61957	4.58424	0.42578	-2.3992			73082	89745	55930	6.90101	21.5577	-8.18581
-12	160323	140555	88764	3.85014	0.707065	-7.52761			181627	170276	86203	1.21645	-0.641367	-14.4016			88224	70466	60867	15.8058	3.49819	-3.15465			74814	79687	56261	8.42447	12.7107	-7.89466
-11.3	159768	140092	82528	3.7619	0.633449	-8.51912			191128	139484	98130	2.77147	-5.68109	-12.4495			68772	67407	62130	2.32411	1.37807	-2.2793			76796	84803	59926	10.1678	17.2107	-4.67094
-11	170259	130120	83965	5.42995	-0.952081	-8.29064			171743	129117	100456	-0.401264	-7.37785	-12.0688			80994	66620	65093	10.7949	0.832615	-0.225712			72644	80182	63206	6.51575	13.1461	-1.78587
-10.3	186373	142728	73177	7.99204	1.05257	-10.0059			185583	135741	94827	1.86393	-6.2937	-12.9901			70137	71254	79014	3.27016	4.04433	9.4226			75294	80146	59245	8.84667	13.1145	-5.26995
-10	182164	143888	84589	7.32282	1.23701	-8.19143			173167	150552	115343	-0.168198	-3.86959	-9.63224			74276	80430	62543	6.1388	10.404	-1.99306			74192	81858	59011	7.87736	14.6203	-5.47577
-9.3	328392	247901	177198	30.5728	17.7749	6.53324			286944	218478	162944	18.4537	7.24784	-1.84139			89445	83448	82339	16.6521	12.4957	11.7271			93851	94099	81983	25.1693	25.3875	14.7303
-9	419648	337054	247223	45.0823	31.95	17.6671			320250	247953	196836	23.9048	12.072	3.7057			95514	108421	92802	20.8584	29.8039	18.9787			103569	94556	77572	33.7172	25.7894	10.8504
-8.3	477403	476877	320523	54.2653	54.1817	29.3217			468916	378812	353674	48.237	33.4897	29.3753			137111	127608	154180	49.6882	43.1019	61.5183			128264	122924	123406	55.4388	50.7418	51.1658
-8	610571	485125	369764	75.4388	55.4931	37.1509			485049	454430	319906	50.8775	45.8661	23.8485			165073	150907	150721	69.068	59.2499	59.121			149722	132687	122771	74.3132	59.3293	50.6072
-7.3	696155	625414	417545	89.0465	77.7988	44.748			610375	569979	541002	71.3895	64.7779	60.0353			184599	204939	173742	82.601	96.6982	75.0763			161032	159174	150870	84.2614	82.6271	75.323
-7	722786	612664	447578	93.2807	75.7715	49.5232	727318	94.0013	666127	604759	530698	80.5145	70.4704	58.3488	709197	87.5637	205109	182130	183440	96.816	80.8898	81.7977	173294	74.7658	169739	158140	143704	91.92	81.7176	69.0198	152706	76.9379
-6.3	730711	672296	459803	94.5408	85.2529	51.4669			698037	622130	542261	85.7372	73.3135	60.2413			203765	203431	190006	95.8845	95.653	86.3485			172881	165160	172613	94.6837	87.8924	94.448
-6	749664	678207	445695	97.5543	86.1928	49.2238	749710	97.5616	723329	725631	613835	89.8767	90.2535	71.9558	785181	100	212989	207806	228476	102.277	98.6852	113.011	209703	100	173397	166288	181767	95.1376	88.8846	102.5	157676	81.3095
-5.3	792383	653028	500806	104.347	82.1893	57.9863			758673	669359	612641	95.6614	81.0434	71.7604			222117	234797	216443	108.604	117.392	104.671			163592	193303	167745	86.5132	112.647	90.1661
-5	756031	722380	496322	98.5666	93.2162	57.2734	765046	100	678103	704900	593247	82.4746	86.8604	68.5862	699361	85.9539	211383	216956	211655	101.164	105.027	101.353	193251	88.5975	169431	180606	172698	91.6491	101.479	94.5228	178925	100
-4.3	727862	670125	454394	94.0878	84.9077	50.6069			681208	640303	503674	82.9828	76.2878	53.9258			210194	235421	206557	100.34	117.825	97.8196			168558	161356	159191	90.8812	84.5464	82.6421
-4	732828	576806	438352	94.8774	70.0702	48.0562	747890	97.2722	666776	553441	527065	80.6207	62.0712	57.7542	757660	95.4956	206030	238664	199657	97.4543	120.072	93.0374	206762	97.9617	164388	151557	166851	87.2133	75.9272	89.3798	158408	81.9533
Basal Media (negative)	136108								174195								65418.7								65236.3
	ArKP1.1 (Assay 1)						ArKP1.1 (Assay 2)				ArKP1.2 (Assay 1)						ArKP1.2 (Assay 2)				ArKP2.2 (Assay 1)						ArKP2.2 (Assay 2)				ArF-SALMFa mix (Assay 1)						ArF-SALMFa mix (Assay 2)				ArL-SALMFa mix (Assay 1)						ArL-SALMFa mix (Assay 2)
	Raw data			Normalized			Raw data		Normalized		Raw data			Normalized			Raw data		Normalized		Raw data			Normalized			Raw data		Normalized		Raw data			Normalized			Raw data		Normalized		Raw data			Normalized			Raw data	Normalized
-9	58145	46035	46058	5.24808	-3.08909	-3.07326	77973	56410	12.0974	5.02295	61236	50719	41864	7.3761	0.135625	-5.96063	66355	43849	8.28573	0.9019	75800	51251	20468	17.4027	0.501883	-20.6908	64704	48624	7.74407	2.4685	54833	50859	39651	2.96792	0.232009	-7.48418	80302	74572	12.8615	10.9816
-8	48888	47639	39244	-1.12493	-1.98481	-7.76438	81458	46756	13.2408	1.85564	58426	44810	43280	5.44154	-3.93245	-4.98578	64983	46927	7.8356	1.91174	61769	39971	28164	7.74304	-7.26388	-15.3925	61282	39462	6.62137	-0.5374	49329	61553	45385	-0.821326	7.59434	-3.53659	62048	46716	6.87268	1.84251
-7	52800	64979	44330	1.5683	9.95298	-4.26291	70164	56353	9.5354	5.00425	47065	65179	42015	-2.37999	10.0907	-5.85668	61953	45641	6.84151	1.48982	51671	55323	37179	0.791034	3.30527	-9.18604	65420	42963	7.97898	0.611218	58530	61264	44798	5.51314	7.39537	-3.94071	58323	46366	5.65057	1.72768	153051	165551	112944	47.4583	53.2443	28.8937	345901	100
-6	78482	71727	56910	19.2492	14.5987	4.39784	94776	66431	17.6102	8.31067	72334	89061	42219	15.0166	26.5323	-5.71623	68460	47125	8.97635	1.9767	55181	48898	30874	3.20751	-1.11805	-13.5267	67965	49147	8.81395	2.64008	59901	62197	41237	6.45701	8.0377	-6.39229	61861	48555	6.81133	2.44586	173477	175738	154584	56.9131	57.9596	48.1679	315403	89.9941
-5	101585	101699	67504	35.1545	35.233	11.6913	166158	132781	41.0294	30.079	82672	74157	67685	22.1338	16.2716	11.8159	141651	103761	32.9891	20.558	52952	50944	32597	1.67294	0.290528	-12.3405	110344	97873	22.7178	18.6263	83807	161519	67801	22.9152	76.4163	11.8958	115546	85701	24.4245	14.6328	266562	163966	146962	100	52.5106	44.6399	306757	87.1575
-4	152987	124977	117910	70.5424	51.2588	46.3935	210346	193091	55.5267	49.8657	98742	125269	88521	33.1972	51.4599	26.1606	184239	132440	46.9615	29.9671	71907	54399	38799	14.7226	2.66914	-8.07075	171883	144228	42.9077	33.8345	143870	122063	84319	64.2658	49.2527	23.2677	161972	125634	39.656	27.7342	195775	183438	155334	67.2343	61.5238	48.5151	301400	85.4
Basal Media (negative)	50522						41100				50522						41100				50522						41100				50522						41100				50522						41100

## Sheet: ArKPR8
																				Bar plot data		ArKP1.1	ArKP1.2	ArKP2.2	ArL-SALMFa mix	ArF-SALMFa mix	Basal Media
	ArKP1.1 (assay 1)						ArKP1.1 (assay 2)						ArKP1.1 (assay 3)							-5	Assay 1	494595	279584	219259	234887	233944	99227
	Raw Data			Normalized			Raw Data			Normalized			Raw Data			Normalized							274103	195554	178123	164423
-15	109803	116114	18683	-0.902827	0.969172	-27.9313	41858	40041	48779	3.03077	1.86356	7.47671	75553	71035	78233	4.49424	3.16014	5.2856					216249	114471	110200	95243
-14.3	122666	118720	19158	2.91266	1.74218	-27.7904	45734	41751	44381	5.52065	2.96204	4.65151	62462	68234	59389	0.628662	2.33305	-0.278749			Assay 2	294526	126161	81699	114414	97973	208694
-14	122157	116493	22942	2.76167	1.08159	-26.6679	47544	43490	48231	6.68337	4.07914	7.12469	71622	64767	78857	3.33347	1.30929	5.46986				229488	96037	51455	89542	77271	167840
-13.3	127488	111188	25199	4.34298	-0.492002	-25.9985	51277	56580	45223	9.08139	12.488	5.19239	57315	61773	69460	-0.89117	0.42521	2.69507				155645	48992	27377	44430	40333
-13	134007	111712	31229	6.27668	-0.33657	-24.2098	43989	44097	46681	4.39969	4.46907	6.12899	62458	63117	77537	0.62748	0.822073	5.08008
-12.3	122704	126607	39448	2.92393	4.08165	-21.7719	52995	49658	40546	10.185	8.04137	2.18796	59771	66410	80834	-0.16595	1.79445	6.05364
-12	119063	140047	48027	1.84392	8.06829	-19.2271	40570	47820	54934	2.20338	6.86067	11.4306	57442	75949	71869	-0.853669	4.61117	3.40641
-11.3	135834	138043	52428	6.81861	7.47385	-17.9217	40668	64019	41123	2.26633	17.2667	2.55862	60215	68586	88829	-0.0348436	2.43699	8.41444
-11	128612	132246	69142	4.67639	5.75432	-12.9639	39470	45932	56663	1.49676	5.64784	12.5413	68515	66653	74742	2.41602	1.8662	4.25476
-10.3	150707	137937	90407	11.2303	7.44241	-6.65616	43634	44195	44640	4.17165	4.53202	4.81788	58810	68343	96093	-0.449719	2.36523	10.5594		In green highlight or blue numbers are data that are considered abnormal measurements
-10	137453	122069	93174	7.29885	2.73557	-5.8354	50156	50303	53746	8.36128	8.45571	10.6674	89379	62521	74180	8.57684	0.646083	4.08881
-9.3	165068	139183	111781	15.4901	7.81201	-0.316103	59942	51255	50623	14.6477	9.06726	8.66127	71727	68193	79335	3.36448	2.32094	5.611
-9	162856	151978	144328	14.834	11.6073	9.33814	49295	54307	65740	7.80818	11.0278	18.3722	81292	98730	97358	6.18888	11.3381	10.9329
-8.3	149854	189532	139363	10.9773	22.7468	7.8654	61554	58509	61659	15.6832	13.7271	15.7506	88408	103200	113101	8.29012	12.658	15.5816
-8	200267	159350	168489	25.931	13.794	16.5049	74176	75459	72014	23.7914	24.6155	22.4025	126171	111204	128941	19.441	15.0214	20.2589
-7.3	201697	210991	213086	26.3552	29.112	29.7335	85658	72062	102701	31.1672	22.4334	42.1154	130818	154174	155583	20.8132	27.7098	28.1259
-7	328018	243544	252777	63.8251	38.7681	41.5068	103009	103388	85637	42.3132	42.5567	31.1537	142538	169214	175726	24.2739	32.1509	34.0738
-6.3	278935	273716	244534	49.2659	47.7178	39.0617	123753	119790	104769	55.6389	53.0931	43.4438	155493	195937	202304	28.0993	40.0418	41.9219
-6	367876	283400	284350	75.648	50.5903	50.8721	108160	110587	117008	45.6221	47.1812	51.306	174601	218816	222894	33.7416	46.7976	48.0018
-5.3	335926	317460	330080	66.1708	60.6934	64.4368	67777	149642	139376	19.6807	72.2695	65.6748	186139	265117	291806	37.1486	60.4696	68.3505
-5	308881	379287	341012	58.1486	79.0328	67.6795	79373	158138	154375	27.1298	77.7272	75.31	206347	300122	306378	43.1157	70.8061	72.6534
-4.3	334271	449973	393538	65.6799	100	83.26	93206	170723	192810	36.0159	85.8117	100	252931	344939	332243	56.8713	84.0399	80.2909
-4	261389	404509	389060	44.0613	86.5143	81.9317	77135	173252	190673	25.6922	87.4362	98.6272	182053	398989	363261	35.9421	100	89.4501
Basal Media (negative)	112847						37140						60333
	ArKP1.2 (Assay 1)						ArKP1.2 (Assay 2)						ArKP2.2 (Assay 1)						ArKP2.2 (Assay 2)						ArL-SALMFa mix (Assay 1)						ArL-SALMFa mix (Assay 2)						ArF-SALMFa mix (Assay 2)						ArF-SALMFa mix (Assay 2)						ArKP1.1 (Assay 1)
	Raw data			Normalized			Raw data			Normalized			Raw data			Normalized			Raw data			Normalized			Raw data			Normalized			Raw data			Normalized			Raw data			Normalized			Raw data			Normalized			Raw data
-9	208096	229869	145151	4.74362	9.9523	-10.3145	102666	51062	29000	-2.27036	-22.3182	-30.8892	211567	219964	168131	5.57398	7.58276	-4.81706	97525	41840	26289	-4.26761	-25.9009	-31.9424	207365	181390	115113	4.56875	-1.64516	-17.5004	88426	89637	35833	-7.80252	-7.33205	-28.2346	243847	180088	119609	13.2962	-1.95663	-16.4248	98732	63439	41752	-3.7987	-17.5098	-25.9351	117276
-8	207702	221451	141332	4.64937	7.93849	-11.2281	96399	61437	29045	-4.70506	-18.2876	-30.8717	217260	226914	138920	6.93589	9.24538	-11.8051	90681	52369	23827	-6.92647	-21.8105	-32.8989	192162	174112	109895	0.931787	-3.38625	-18.7487	101561	74146	44283	-2.69965	-13.3502	-24.9518	244421	203088	111206	13.4335	3.54558	-18.435	96006	66868	37179	-4.85773	-16.1777	-27.7117	135894
-7	212235	216258	149492	5.73378	6.69619	-9.27601	107534	69738	29320	-0.37917	-15.0627	-30.7649	214324	212298	115249	6.23352	5.74885	-17.4678	82664	58398	27993	-10.041	-19.4682	-31.2804	201662	180502	113125	3.20444	-1.85759	-17.976	106356	75201	41712	-0.836817	-12.9404	-25.9506	225702	166702	100147	8.95544	-5.15892	-21.0806	92109	83753	43118	-6.3717	-9.61795	-25.4044	183679
-6	215470	231273	178889	6.50768	10.2882	-2.24347	99123	67209	31036	-3.6468	-16.0452	-30.0982	228874	205511	147865	9.71427	4.12522	-9.66523	98080	50145	27563	-4.052	-22.6745	-31.4475	241067	176714	115752	12.6312	-2.76378	-17.3475	94690	72601	45295	-5.36899	-13.9504	-24.5587	208062	162500	125067	4.73549	-6.16415	-15.1191	117879	69686	40469	3.6398	-15.0829	-26.4335	230627
-5	279584	274103	216249	21.8454	20.5342	6.69403	126161	96037	48992	6.85731	-4.84569	-23.1224	219259	195554	114471	7.41411	1.74324	-17.654	81699	51455	27377	-10.4159	-22.1655	-31.5197	234887	178123	110200	11.1527	-2.42671	-18.6757	114414	89542	44430	2.29367	-7.36896	-24.8947	233944	164423	95243	10.9271	-5.70412	-22.2538	97973	77271	40333	-4.09356	-12.1362	-26.4864	294526
-4	368136	361679	271003	43.0294	41.4847	19.7926	146679	119862	68621	14.8284	4.41019	-15.4967	227304	190859	126969	9.33868	0.620075	-14.6641	103067	65279	28927	-2.11457	-16.795	-30.9175	301679	237080	167905	27.1311	11.6774	-4.87113	125950	107585	69594	6.77534	-0.359357	-15.1186	219700	164671	98777	7.5196	-5.64479	-21.4084	106876	78022	44912	-0.6348	-11.8444	-24.7075	365914
Basal Media (negative)	188267						108510						188267						108510						188267						108510						188267						108510						188267
[truncated: 7 more columns]

## Sheet: ArKPR9
																																						Bar plot data		ArKP1.1	ArKP1.2	ArKP2.2	ArL-SALMFa mix	ArF-SALMFa mix	Basal Media
	ArKP1.1 (assay 1)				ArKP1.1 (assay 2)						ArKP1.1 (assay 3)				ArKP1.1 (assay 4)				ArKP1.2 (assay 1)						ArKP1.2 (assay 2)				ArKP1.2 (assay 3)				ArKP1.2 (assay 4)					-5	Assay 1		255898	89954	194359	108569	71383
	Raw Data		Normalized		Raw Data			Normalized			Raw Data		Normalized		Raw Data		Normalized		Raw Data			Normalized			Raw Data		Normalized		Raw Data		Normalized		Raw Data		Normalized							68726	132517	70728
-15	8580	7388	12.8099	-7.7135	23656	20170	21331	14.2974	-6.08319	0.704493	68155	63666	14.9543	3.1585	134950	127157	19.0319	14.3458	35138	73520	27041	5.90191	50.6701	-3.54231	97107	77594	27.1797	12.3805	125086	91931	8.82281	-5.01088	163407	220920	-14.0051	7.85343						56791	140813	70374
-14.3	8855	7461	17.5448	-6.45661	22958	22493	23193	10.2166	7.49803	11.5905	68462	65219	15.761	7.23933	140855	125813	22.5826	13.5377	41584	56612	30658	13.4204	30.9489	0.676503	92485	83970	23.6743	17.2163	108666	101415	1.97168	-1.05375	151736	243717	-18.4408	16.5177			Assay 2	100420	126167	111630	96609	67962	78217
-14	8360	8495	9.02204	11.3464	24014	19819	18133	16.3904	-8.13529	-17.9923	65208	63982	7.21043	3.98886	139229	121632	21.6049	11.0236	31031	32091	22003	1.11156	2.34793	-9.41856	122068	81389	46.1108	15.2588	119382	99282	6.44286	-1.94373	133207	228439	-25.483	10.7111				128024	140487	64026	94862	57455
-13.3	8007	7628	2.94421	-3.58127	21658	21890	22407	2.61627	3.97264	6.99524	69167	66688	17.6135	11.0994	145624	112386	25.4503	5.46384	32429	27123	28621	2.74217	-3.44667	-1.69942	162098	83321	76.4706	16.7241	135547	88910	13.1876	-6.27137	156559	218273	-16.6078	6.8474				135478	126889	36645	71248	32440
-13	8144	6944	5.30303	-15.3581	21522	20253	18896	1.82116	-5.59794	-13.5315	70550	66700	21.2476	11.131	152628	133995	29.6619	18.4576	34065	27003	26565	4.65038	-3.58663	-4.09751	112998	88252	39.2319	20.4639	114503	86221	4.40713	-7.39334	150740	217448	-18.8194	6.53385
-12.3	8564	7029	12.5344	-13.8946	23869	19675	18915	15.5427	-8.97717	-13.4204	69674	62994	18.9458	1.39268	123430	116296	12.1047	7.81498	41424	34518	29833	13.2338	5.17875	-0.285764	116334	84996	41.762	17.9944	149695	113829	19.0907	4.12591	170529	234980	-11.2983	13.1971
-12	8010	6706	2.99587	-19.4559	24576	20938	21127	19.6761	-1.59315	-0.488176	71888	66732	24.7635	11.2151	143782	115327	24.3427	7.2323	37190	30592	29137	8.29533	0.599522	-1.09757	117871	81002	42.9277	14.9653	127548	81258	9.85006	-9.46411	174337	218279	-9.85103	6.84968
-11.3	8338	7410	8.64325	-7.33471	23685	20204	18722	14.467	-5.88442	-14.5488	69406	65063	18.2415	6.82941	121670	114785	11.0464	6.90639	40297	33734	29991	11.9193	4.2643	-0.101475	108898	79107	36.1223	13.528	134656	98180	12.8158	-2.40353	187646	255070	-4.79278	20.8326
-11	7857	7222	0.36157	-10.5716	24839	23449	19309	21.2137	13.0872	-11.117	70360	63107	20.7484	1.68962	124358	109746	12.6628	3.87637	41302	28022	30514	13.0915	-2.39809	0.508544	101408	77797	30.4417	12.5345	132190	94269	11.7869	-4.03537	181868	225701	-6.98878	9.6705
-10.3	8549	6853	12.2762	-16.9249	23631	19899	18666	14.1512	-7.66757	-14.8762	65550	68454	8.1091	15.74	136161	110862	19.7601	4.54744	39970	30537	33881	11.5379	0.535371	4.43576	95343	67708	25.8419	4.88275	177488	127961	30.6872	10.0224	211012	317216	4.08776	44.4519		In green highlight or blue numbers are data that are considered abnormal measurements
-10	7995	7080	2.7376	-13.0165	23578	21553	20604	13.8414	2.0024	-3.54585	64537	64395	5.44724	5.0741	152778	118347	29.7521	9.04827	42375	31935	39101	14.343	2.16598	10.5243	103565	85733	32.0776	18.5534	130197	99664	10.9553	-1.78434	157613	237145	-16.2072	14.0199
-9.3	8512	8345	11.6391	8.76377	24241	22282	18567	17.7176	6.26443	-15.455	66604	66363	10.8787	10.2454	141842	120087	23.1761	10.0946	36987	32831	38340	8.05855	3.21106	9.63667	94835	83894	25.4566	17.1586	162150	123649	24.2875	8.22323	238722	260596	14.6193	22.9328
-9	8278	7423	7.61019	-7.11088	23052	19922	22488	10.7662	-7.53311	7.46879	68500	64785	15.8608	6.09891	132649	114417	17.6483	6.68511	44476	36868	46474	16.7936	7.91975	19.124	108592	92789	35.8902	23.9048	163985	97954	25.0531	-2.49783	189200	258084	-4.20216	21.9781
-8.3	8111	8084	4.73485	4.26997	27123	24934	20608	34.5669	21.7691	-3.52246	75463	69993	34.1576	19.784	120613	112423	10.4108	5.48609	50943	40474	57321	24.3366	12.1257	31.7758	116170	91402	41.6376	22.8529	212480	158757	45.2873	22.8718	236953	325112	13.947	47.4529
-8	7673	8343	-2.80647	8.72934	27843	21906	26045	38.7763	4.06618	28.2645	74968	71342	32.8568	23.3288	129057	146769	15.4883	26.1388	63143	74921	58254	38.5665	52.3042	32.8641	120210	87679	44.7016	20.0293	232497	185889	53.6393	34.1924	239316	336838	14.8451	51.9095
-7.3	8725	8405	15.3065	9.79683	27539	23867	23536	36.999	15.531	13.5958	72931	73998	27.5042	30.308	137303	138392	20.4468	21.1016	73665	61737	54686	50.8392	36.9266	28.7024	158656	132703	73.8601	54.1767	262356	213831	66.0978	45.851	254572	377683	20.6433	67.4332
-7	9371	8176	26.4291	5.85399	29332	28579	22770	47.4817	43.0793	9.11748	72517	66429	26.4163	10.4189	140742	140340	22.5147	22.273	68334	68057	72491	44.6212	44.2981	49.4699	131149	104041	52.9981	32.4386	267871	204268	68.3989	41.8609	287449	397192	33.1386	74.8478
-6.3	10051	9115	38.1371	22.0213	29692	28551	27193	49.5864	42.9156	34.9762	78099	70982	41.0842	22.3828	172816	166460	41.8012	37.9793	89929	82765	90260	69.8093	61.4533	70.1954	168973	103561	81.6848	32.0746	302809	220862	82.9765	48.7847	284521	415141	32.0258	81.6696
-6	10337	9764	43.0613	33.1956	29938	28851	27443	51.0246	44.6695	36.4378	83064	78221	54.1308	41.4048	180799	171783	46.6015	41.1801	95701	75077	82463	76.5417	52.4861	61.1011	181454	95730	91.1507	26.1354	343609	269720	100	69.1703	366766	372725	63.284	65.5488
-5.3	11897	10634	69.9208	48.1749	35010	29973	28447	80.6776	51.2292	42.3076	82562	78453	52.8116	42.0144	211262	174801	64.9193	42.9948	94763	82522	89756	75.4476	61.1699	69.6075	193122	92167	100	23.4331	323965	286234	91.8037	76.0607	380488	461896	68.4993	99.4394
-5	11830	10935	68.7672	53.3574	33097	29728	28501	69.4934	49.7968	42.6233	88175	80849	67.561	48.3104	201180	179167	58.8569	45.6202	90109	99793	76326	70.0192	81.3145	53.943	176880	101187	87.6816	30.2741	314531	262547	87.8674	66.1774	352039	435241	57.6869	89.3088
-4.3	13239	11739	93.0269	67.2004	37004	38315	31726	92.3354	100	61.478	85267	87722	59.9196	66.3706	207749	198112	62.8069	57.0121	115017	85879	73535	99.0716	65.0854	50.6876	165814	106856	79.2889	34.5736	335403	290943	96.5761	78.0255	396474	409313	74.5749	79.4546
-4	13644	11390	100	61.1915	35368	37290	35839	82.7706	94.0074	85.5243	100520	87156	100	64.8833	269602	207825	100	62.8526	115813	92243	85080	100	72.5083	64.1535	184868	123579	93.74	47.2568	312104	290118	86.8548	77.6813	390651	463371	72.3618	100
Basal Media (negative)	7836				21210.5						62464				103230				30078						61270				103940				200256
	ArKP2.2 (Assay 1)						ArKP2.2 (Assay 2)						ArL-SALMFa mix (Assay 1)						ArL-SALMFa mix (Assay 2)						ArF-SALMFa mix (Assay 2)						ArF-SALMFa mix (Assay 2)						ArKP1.1 (Assay 2)						ArKP1.2 (Assay 1)		ArKP1.2 (Assay 2)
	Raw data			Normalized			Raw data			Normalized			Raw data			Normalized			Raw data			Normalized			Raw data			Normalized			Raw data			Normalized			Raw data			Normalized			Raw Data	Normalized	Raw data			Normalized
-9	85025	64295	67808	5.05928	-5.19782	-3.4596	62461	55621	52193	9.27149	1.78557	-1.96615	115478	72644	80394	20.1273	-1.06678	2.76788	51260	44931	45604	-2.98726	-9.91392	-9.17737	97002	84646	80698	10.9854	4.87175	2.9183	66094	50973	37142	13.2476	-3.30136	-18.4385
-8	92086	70887	68810	8.55302	-1.93613	-2.96382	69670	65419	44123	17.1613	12.5088	-10.7982	104876	86038	74925	14.8814	5.5605	0.0618493	66707	53353	42716	13.9185	-0.696607	-12.3381	91874	65489	67163	8.44813	-4.60703	-3.77875	53108	64070	43701	-0.964743	11.0324	-11.2601
-7	91558	69059	61390	8.29177	-2.84062	-6.6352	57891	64015	45605	4.26993	10.9722	-9.17627	104813	78334	77567	14.8503	1.7486	1.3691	59791	59462	41788	6.34935	5.98929	-13.3537	103638	77314	65486	14.2689	1.24391	-4.60852	53990	68475	34148	0.000547217	15.8534	-21.7152	91586	89626	77636	41.1469	39.0018	25.8795	219236	71.4662	108449	122443	109535	59.6023	74.9178
-6	86337	72605	73102	5.70845	-1.08607	-0.840162	72627	56411	60163	20.3975	2.65017	6.75648	154784	108014	101561	39.5757	16.4341	13.2412	68280	71007	48855	15.64	18.6245	-5.61937	99073	81929	66936	12.0102	3.52739	-3.89107	56193	41806	35905	2.41158	-13.334	-19.7923	117336	112206	103580	69.3285	63.7141	54.2735	266075	94.6419	142357	125871	104892	96.7123	78.6695
-5	89954	68726	56791	7.49812	-3.00538	-8.91076	111630	64026	36645	63.0837	10.9843	-18.9824	194359	132517	140813	59.1572	28.5581	32.6629	96609	94862	71248	46.6442	44.7322	18.8883	108569	70728	70374	16.7087	-2.0148	-2.18996	67962	57455	32440	15.292	3.79276	-23.5845	128024	135478	100420	81.0258	89.1837	50.8151	255898	89.6063	126889	140487	126167	79.7836	94.6657
-4	99128	73206	61568	12.0374	-0.788703	-6.54712	66785	69290	33939	14.0038	16.7454	-21.9439	209504	179214	149120	66.6508	51.6635	36.7731	111321	115899	65936	62.7455	67.7558	13.0746	129040	85901	75386	26.8377	5.49272	0.28995	76059	56570	21506	24.1536	2.82418	-35.551	135605	135972	86472	89.3227	89.7244	35.5499	276904	100	145361	145015	121855	100	99.6213
Basal Media (negative)	74800						53989.5						74800						53989.5						74800						53989.5						53989.5						74800		53989.5
[truncated: 1 more columns]

## Sheet: ArKPR10
	ArKP1.1 (assay 1)						ArKP1.1 (assay 2)						ArKP1.2 (assay 1)						ArKP1.2 (assay 2)						ArKP2.2 (assay 1)						ArKP2.2 (assay 2)						ArL-SALMFa Mix (assay 1)						ArL-SALMFa Mix (assay 2)						ArF-SALMFa Mix (assay 1)
	Raw Data			Normalized			Raw Data			Normalized			Raw Data			Normalized			Raw Data			Normalized			Raw Data			Normalized			Raw Data			Normalized			Raw Data			Normalized			Raw Data			Normalized			Raw Data
-9	64324	60774	34605	1.09865	0.736874	-1.93	69328	57115	54428	0.758736	-0.389807	-0.642499	54020	51196	31600	0.0485769	-0.239216	-2.23623	64280	60987	51045	0.284009	-0.0256736	-0.960645	54973	42343	34383	0.145697	-1.14142	-1.95262	63682	58672	39799	0.227771	-0.243382	-2.01825	74760	37594	29958	2.16218	-1.62539	-2.40357	64178	62904	31423	0.274416	0.154606	-2.80595	48100
-8	62904	52854	31459	0.953941	-0.0702496	-2.2506	70504	59172	43828	0.86933	-0.196361	-1.63935	56022	50411	33532	0.2526	-0.319215	-2.03935	61266	61394	43858	0.000564256	0.0126017	-1.63653	60362	45046	31432	0.694887	-0.865959	-2.25336	64785	60162	37619	0.3315	-0.103259	-2.22326	53664	49277	31218	0.0122971	-0.43478	-2.27516	63614	60825	32728	0.221376	-0.0409085	-2.68322	56919
-7	63067	47663	30967	0.970552	-0.599262	-2.30074	79336	59345	51271	1.69991	-0.180092	-0.939391	54653	45043	31034	0.113086	-0.866265	-2.29392	63055	56461	48654	0.168806	-0.45131	-1.1855	53582	42827	36304	0.0039405	-1.0921	-1.75685	65952	60683	34577	0.441248	-0.0542626	-2.50934	54051	44849	31759	0.0517361	-0.886035	-2.22003	67965	54738	30646	0.630556	-0.613346	-2.87902	55436
-6	58166	50558	38208	0.471094	-0.304234	-1.56282	73525	65782	45914	1.15343	0.425261	-1.44318	58647	47666	32069	0.520112	-0.598956	-2.18844	60275	60255	44929	-0.092632	-0.0945128	-1.53581	63204	40604	30356	0.984514	-1.31864	-2.36301	65243	59592	35464	0.374572	-0.156863	-2.42592	55538	38332	33126	0.203276	-1.55018	-2.08072	64745	51829	27653	0.327738	-0.886916	-3.16049	51488
-5	59139	59547	56647	0.570252	0.611831	0.316293	67964	60427	51113	0.630462	-0.0783375	-0.95425	64045	48431	31715	1.07022	-0.520995	-2.22451	61189	59817	43385	-0.00667702	-0.135703	-1.68101	54314	37654	32215	0.0785383	-1.61927	-2.17356	64679	62104	37641	0.321532	0.0793719	-2.22119	48866	36664	32718	-0.476665	-1.72016	-2.1223	65803	53728	32114	0.427235	-0.708329	-2.74097	62429
-4	64319	61738	37798	1.09814	0.835114	-1.6046	73982	63333	46124	1.19641	0.19495	-1.42343	52107	53934	35530	-0.146376	0.0398126	-1.83573	75864	62389	46456	1.3734	0.106174	-1.39221	52590	41767	31385	-0.0971537	-1.20012	-2.25814	65327	59737	33753	0.382471	-0.143227	-2.58683	51447	41691	25856	-0.213636	-1.20787	-2.8216	69425	55386	29529	0.767858	-0.552406	-2.98407	51476
Basal Media (negative)	53543.3						61260						53543.3						61260						53543.3						61260						53543.3						61260						53543.3
Bar plot data		ArKP1.1	ArKP1.2	ArKP2.2	ArL-SALMFa mix	ArF-SALMFa mix	Basal Media	Triton X-100
-5	Assay 1	59139	64045	54314	48866	62429	53543.3	1034806
		59547	48431	37654	36664	34867
		56647	31715	32215	32718	26807
	Assay 2	67964	61189	64679	65803	70504	61260	1124608
		60427	59817	62104	53728	46480
		51113	43385	37641	32114	21052
[truncated: 15 more columns]

[truncated: 4 more sheets: ArKPR11, Empty vector, ArTKR1, ArTKR2]
