# Supplementary material for: Receptor deorphanization in an echinoderm reveals kisspeptin evolution and relationship with SALMFamide neuropeptides
Source: BMC Biol. 2022 Aug 24;20:187. doi: 10.1186/s12915-022-01387-z (PMC9400282; doi:10.1186/s12915-022-01387-z)
Supplement: Supplementary file 17 — Additional file 17. Source sequence data for the comparative analysis of the structure of genes encoding precursors of candidate ligands for kisspeptin-type receptors in the starfish A. rubens and genes encoding vertebrate kisspeptin precursors, as shown in Fig. 4, and genes encoding precursors of candidate ligands for kisspeptin-type receptors in other echinoderms, as shown in additional file 16. [file 12915_2022_1387_MOESM17_ESM.xlsx]

## Sheet: Sheet1
Specie	Gene name	Scaffold/Chromosome ID	Protein ID	mRNA ID	Direction	Start	End	Codifying Exon	Intron phase
Asterias rubens	KPP1	NC_047083.1	XP_033645728.1	XM_033789837.1	>	2892453	2893113	1	+1
								2
	KPP2	NC_047083.1	XP_033645787.1	XM_033789896.1	<	8061850	8062582	1	N/A
								2
	L-SALMFaP	NC_047074.1	XP_033637817.1	XM_033781926.1	>	1298721	1299297	1	0
								2
	F-SALMFaP	NC_047074.1	XP_033637995.1	XM_033782104.1	<	14525979	14526763	1	0
								2
Acanthaster planci	KPP1	NW_019091375.1	XP_022083853.1	XM_022228161.1	<	1877174	1889813	1	+1
								2
	KPP2	NW_019091371.1	XP_022082619.1	XM_022226927.1	>	2224507	2225061	1	N/A
								2
	L-SALMFaP	NW_019091431.1	XP_022095156.1	XM_022239464.1	<	640496	662536	1	0
								2
	F-SALMFaP	NW_019091460.1	XP_022098656.1	XM_022242964.1	>	841196	844752	1	0
								2
Strongylocentrotus purpuratus	KPP1	NW_011980247.1	XP_003725009.1	XM_003724961.2	<	553494	557310	1	+1
								2
	KPP2	NW_011995666.1	XP_011683115.1	XM_011684813.1	<	482555	506548	1	+1
								2
	KPP3	NW_011993267.1	XP_011679113.1	XM_011680811.1	<	527623	529499	1	+1
								2
	L-SALMFaP	NW_011995033.1	EC439101	XR_973850.1	<	359370	409628	1	0
								2
	F-SALMFaP	NW_011969138.1	XP_003724375.1	XM_003724327.2	<	470320	473816	1	0
								2
Apostichopus japonicus	KPP1	MF401998.1	AWU78782.1	MF401998.1	<	102625	108470	1	+1
								2
	L-SALMFaP	MF402000.1	AWU78784.1	MF402000.1	<	134131	176274	1	0
								2
	F-SALMFaP	MRZV01000929.1	PIK42498.1	MRZV01000929.1	>	214416	218655	1	0
								2
